1     **Title: Calculating the Effects of Autism Risk Gene Variants on Dysfunction of Biological**  
2                                   **Processes Identifies Clinically-Useful Information**

3  
4     **Authors:** Olivia J. Veatch<sup>1\*</sup>, Diego R. Mazzotti<sup>1</sup>, James S. Sutcliffe<sup>2</sup>, Robert T. Schultz<sup>3</sup>, Ted  
5     Abel<sup>4</sup>, Birkan Tunc<sup>3</sup>, Susan G. Assouline<sup>5</sup>, Edward S. Brodtkin<sup>6</sup>, Jacob J. Michaelson<sup>7</sup>, Thomas  
6     Nickl-Jockschat<sup>7</sup>, Zachary E. Warren<sup>8</sup>, Beth A. Malow<sup>9</sup>, Allan I. Pack<sup>1</sup>

7     **Affiliations:**

8     <sup>1</sup>Center for Sleep and Circadian Neurobiology, Perelman School of Medicine, University of  
9     Pennsylvania.

10  
11    <sup>2</sup>Vanderbilt Genetics Institute, Department of Molecular Physiology and Biophysics, Vanderbilt  
12    University Medical Center.

13  
14    <sup>3</sup>Center for Autism Research, Children's Hospital of Philadelphia.

15  
16    <sup>4</sup>Iowa Neuroscience Institute, University of Iowa.

17  
18    <sup>5</sup>Belin-Blank Center for Gifted Education and Talent Development, University of Iowa.

19  
20    <sup>6</sup>Department of Psychiatry, Perelman School of Medicine at the University of Pennsylvania.

21  
22    <sup>7</sup>Department of Psychiatry, University of Iowa.

23  
24    <sup>8</sup>Department of Pediatrics, Vanderbilt University Medical Center.

25  
26    <sup>9</sup>Department of Neurology, Vanderbilt University Medical Center.

27    \*To whom correspondence should be addressed: [veatcho@upenn.edu](mailto:veatcho@upenn.edu).

28    **One Sentence Summary:** A novel approach we developed to interrogate previously reported  
29    risk genes for autism identified pharmacogenetics information that is clinically-relevant.

30

31 **Abstract**

32 Autism spectrum disorders (ASD) are neurodevelopmental conditions that are influenced by  
33 genetic factors and encompass a wide-range and severity of symptoms. The details of how  
34 genetic variation contributes to variable symptomatology are unclear, creating a major challenge  
35 for translating vast amounts of data into clinically-useful information. To determine if variation  
36 in ASD risk genes correlates with symptomatology differences among individuals with ASD,  
37 thus informing treatment, we developed an approach to calculate the likelihood of genetic  
38 dysfunction in Gene Ontology-defined biological processes that have significant  
39 overrepresentation of known risk genes. Using whole-exome sequence data from 2,381  
40 individuals with ASD included in the Simons Simplex Collection, we identified likely damaging  
41 variants and conducted a clustering analysis to define subgroups based on scores reflecting  
42 genetic dysfunction in each process of interest to ASD etiology. Dysfunction in cognition-related  
43 genes distinguished a distinct subset of individuals with increased social deficits, lower IQs, and  
44 reduced adaptive behaviors when compared to individuals with no evidence of cognition-related  
45 gene dysfunction. In particular, a stop-gain variant in the pharmacogene encoding  
46 cyclooxygenase-2 was associated with having an IQ<70 (i.e. intellectual disability), a key  
47 comorbidity in ASD. We expect that screening genes involved in cognition for deleterious  
48 variants in ASD cases may be useful for identifying clinically-informative factors that should be  
49 prioritized for functional follow-up. This has implications in designing more comprehensive  
50 genetic testing panels and may help provide the basis for more informed treatment in ASD.

51

## 52 **Introduction**

53 Autism spectrum disorders (ASD) are a group of neurodevelopmental conditions  
54 characterized by core symptoms that include impairments in social interactions, delays in  
55 language development and expression of repetitive interests and/or behaviors(1). ASDs manifest  
56 along a wide distribution of core symptom severity, and numerous different comorbidities are  
57 highly prevalent [e.g., intellectual disability(2), gastrointestinal issues(3)]. Evidence supports  
58 contributions from different types of common and rare genetic variation – including inherited  
59 and *de novo* single nucleotide variants (SNVs), small insertions or deletions (In/Dels), and large  
60 insertions or deletions (CNVs) – in hundreds of genes(4, 5). The already large, and rapidly  
61 expanding, landscape of genetic factors involved in expression of ASD makes it difficult to  
62 determine how results from genetic studies can translate into clinically-useful information(6-8).  
63 A crucial step toward using genetics to inform more effective, personalized approaches for  
64 treatment of individuals with ASD is to better understand how variation in implicated genes  
65 influences expression of core symptoms and comorbidities.

66 While there are more than one hundred implicated genes, many function in the same  
67 biological process(9, 10). Dysfunction in genetic mechanisms encoding different biological  
68 functions may contribute independently to increase risk for ASD. For example, one study  
69 observed that a subset of individuals with ASD had *de novo* and rare, inherited variants in  
70 synaptic genes but not chromatin modification genes, while another subset had these types of  
71 variants in chromatin modification genes but not synaptic genes(11). If some individuals with  
72 ASD have dysfunction in a particular biological process while others have dysfunction in a  
73 separate process, then it may be possible to use genetic data to inform a more personalized (i.e.,  
74 precision medicine) approach to treatment of symptoms. However, the study mentioned above,

75 and others, have not observed a relationship between genetic and phenotypic differences(11, 12).  
76 As such, it is difficult to determine if distinguishing dysfunction across different underlying  
77 biological processes is clinically useful. Notably, previous studies have focused largely on  
78 evaluating contributions from specific *types* of genetic variants (e.g., solely *de novo* and rare  
79 variants, or common variants) to explain phenotypic differences(11-16). A more holistic  
80 approach that incorporates all relevant risk variation is better situated to ask how overall genetic  
81 risk is related to particular symptom profiles that are unique to the individual(17, 18).

82 Furthermore, to enable use of disparate genetic information in personalized medicine  
83 approaches for ASD, ability to predict functional effects of a given variant on the ASD risk gene  
84 and encoded protein is essential and may require functional analysis to test(19). While functional  
85 study of every suspected ASD risk variant is desirable in the long-term, reliance on such a  
86 strategy is not feasible if genetic findings are to be rapidly translated in the clinic. It may be more  
87 immediately useful to have computational approaches which incorporate evidence from multiple  
88 sources to allow for more thorough *in silico* predictions from patient data to help pinpoint  
89 specific genes and variants that should be prioritized for functional follow-up(20-22).

90 To determine if current genetic evidence could help explain variability in ASD  
91 symptoms, and ultimately inform treatment approaches, we developed an approach to calculate  
92 the likelihood that a biological process with overrepresentation of ASD candidate genes is  
93 dysfunctional. We evaluated the approach using whole-exome sequencing and phenotype data  
94 from the Simons Simplex Collection (SSC)(23). We hypothesized that incorporating evidence  
95 from all possible types of genetic variation to calculate cumulative risk of dysfunction overall in  
96 biological processes would identify underlying mechanisms contributing to differences in  
97 symptomatology among individuals with ASD. We also expected that careful evaluation of the

98 current genetic evidence would be useful to recognizing ASD-related variants that are already  
99 clinically-actionable as many individuals carry pharmacogenetics variants which influence how a  
100 patient responds to a drug(24).

## 101 **Materials and Methods**

### 102 *Identification of Genetic Mechanisms Relevant to ASD*

103 To assess the influences of predicted dysfunction in overall biological processes, we  
104 compiled a list of ASD candidate genes using the Autism Informatics Portal (AutDB,  
105 <http://autism.mindspec.org/autdb/Welcome.do>)(25), which is continuously updated with manual  
106 annotations as new scientific literature is published. As the goal was to determine if any genes  
107 evidenced to have a relationship with ASD were useful to understanding symptom variability  
108 and informing personalized treatment approaches, all genes were considered regardless of the  
109 strength of evidence supporting an association with ASD (December 2017 update). Official Gene  
110 Symbols were converted to Ensembl IDs using the Gene ID Conversion Tool available in the  
111 database for annotation, visualization and integrated discovery (DAVID)(26). Ensembl IDs for a  
112 subset of these genes could not be converted via DAVID and were manually identified by  
113 searching the Ensembl database. Gene set overrepresentation analyses were run on all candidate  
114 genes for ASD using the classic algorithm and Fisher's exact test from the TopGO package in  
115 R(27). Overrepresented processes were interrogated to identify terms representing processes  
116 useful to ASD etiology ('unique terms'; *Table S1*). Processes were considered biologically  
117 meaningful unique terms if they represented the initial process in each GO hierarchy that was  
118 system-, organ-, tissue-, or organelle-specific (e.g., 'GO:0007399=nervous system  
119 development'). GO term definitions were based on AmiGO version 1.8, GO version 2018-01-01.

### 120 *Calculation of Overall Biological Process Dysfunction*

121 Variants identified using whole-exome sequencing available for a total of 2,392  
122 individuals with ASD whose data were included in the Simons Simplex Collection (SSC)  
123 dataset(23) are provided by the Simons Foundation Autism Research Initiative and WuXi  
124 NextCODE: A Contract Genomics Organization (<https://www.wuxinextcode.com/>). The SSC  
125 represents the largest collection of simplex autism families, with one affected child and at least  
126 one unaffected sibling, collected to date(23). Data are made available to approved researchers via  
127 the Sequence Miner Tool 5.24.7. Gender discrepancies were first identified using the ‘Sex  
128 Check’ report builder in Sequence Miner. This algorithm evaluates both the ratio of  
129 heterozygous SNPS on the X chromosome compared to autosomes and coverage of the Y  
130 chromosome gene, *SRY*. Seven individuals with unclear gender assignments, 2 individuals with  
131 47,XYY and one individual with 47,XXX were excluded from analyses. Genome-wide  
132 genotyping and whole-exome sequence data for all but one individual in the evaluated dataset  
133 (n=2,381) was previously interrogated to identify *de novo* and rare, inherited copy number  
134 variants (CNVs)(11, 28). The final analysis dataset included 2,381 individuals who were 4-18  
135 years old at the time of data collection. The dataset was 86% male and 79% parent-reported  
136 white (Table S2).

137 Variation Annotation queries were performed in Sequence Miner (29) to identify single  
138 nucleotide variants (SNVs) and short insertions or deletions (<200bp; In/Dels) located in protein  
139 coding gene transcripts that had Variant Effect Predictor(29) consequences that were highly  
140 likely to be damaging to the encoded protein product (i.e., splice site alterations, gains or losses  
141 of stop codons, loss of start codons, or frameshifts). We considered variants were called by either  
142 the Genome Analysis Toolkit (GATK)(30) or FreeBayes(31) software across all 22 autosomes  
143 and both sex chromosomes. Quality Control thresholds included depth  $\geq 8$  reads and genotype

144 quality for variant calls of  $\geq 20$ (32). Variants flagged as ‘LowQuality’ as indicated by GT Filter  
145 criteria were excluded.

146 The final list of variants passing QC, that were predicted by VEP to be very likely to be  
147 damaging, were interrogated to identify those located in transcripts for ASD risk genes (included  
148 the Autism Informatics Portal) that were protein coding (*Table S3*). Notably, the Sequence Miner  
149 platform reports Ensembl IDs for each gene in the query output. While these were used to ensure  
150 the appropriate VEP predictions and help search the current Ensembl database, some of the  
151 Ensembl IDs provided with this platform were outdated and are now represented by new IDs. As  
152 such, both Ensembl IDs and gene names were cross-referenced to compare those provided by  
153 Sequence Miner and those mapped using DAVID and manual searches. Discrepancies were  
154 further interrogated to verify that the VEP prediction was not based on a variant location in an  
155 alternate transcript that is not supported by evidence in Ensembl.

156 There is substantial variability in pathogenicity predictions depending on the algorithm  
157 employed (e.g., based on variant location, evolutionary conservation, protein  
158 structure/function)(21, 33). Therefore, to more completely assess the likelihood of a variant  
159 being damaging and ultimately resulting in a dysfunctional protein product, nine different variant  
160 prediction algorithms were run on all of the variants pulled from Sequence Miner using filter-  
161 based annotation from ANNOtate VARIation (ANNOVAR) software(34). *In silico* prediction  
162 algorithms included: 1) Sorts Intolerant From Tolerant (SIFT)(35), 2) Polymorphism  
163 Phenotyping v2 (Polyphen-2) HVAR(36), 3) Mutation Taster(37), 4) Mutation Assessor(38), 5)  
164 Likelihood Ratio Test (LRT)(39), 6) FATHMM-MKL(40), 7) PROVEAN, 8) MetaLR(41), and  
165 9) Mendelian Clinically Applicable Pathogenicity (M-CAP)(42). Genomic locations of variants  
166 available from Sequence Miner are based on Human Genome Build GRCh37/hg19; all analyses

167 were conducted based on these genomic locations. Each prediction algorithm uses different  
168 nomenclature to denote variant predictions. To allow for cross-comparison of results from  
169 different predictors, scores were recoded as either benign (B), damaging (D), or unknown (U) as  
170 follows: SIFT: damaging (D)=D, tolerant (T)=B; Polyphen2 HVAR probably damaging (D)=D,  
171 possibly damaging (P)=U, benign (B)=B; LRT: deleterious(D)=D, unknown(U)=U,  
172 neutral(N)=B, Mutation Taster: disease causing automatic(A)=D, disease causing(D)=D,  
173 polymorphism(N)=B, polymorphism automatic(P)=B; Mutation Assessor: predicted functional  
174 (H, M)=D, predicted non-functional (L, N)=B; FATHMM-MKL: damaging(D)=D,  
175 neutral(N)=B; PROVEAN: deleterious(D)=D, neutral(N)=B; MetaLR: damaging(D)=D,  
176 tolerant(T)=B; M-CAP: pathogenic(D)=D, benign(T)=B.

177 We developed the following equation to calculate the likelihood that a variant was  
178 damaging to the function of the encoded protein product:

$$179 \quad LDV = CR \times FD \times Z$$

180 Where  $LDV$  = the likelihood that the variant is damaging;  $CR$  = the number of variant callers  
181 that called the variant (based on GATK and FreeBayes software);  $FD = ((D - B) + 1) / (N + 1)$   
182 where  $D$  = the number of *in silico* prediction algorithms that called the variant damaging,  $B$  =  
183 the number of algorithms that called the variant benign,  $N$  = the total number of algorithms that  
184 provided a prediction for the variant, and 1 = a constant to account for the fact that variants were  
185 preselected according to variant effect predictions indicating a high potential to be deleterious to  
186 at least one gene transcript based on the genetic location; and  $Z$  = zygosity where heterozygous  
187 calls=1 and homozygous calls=2. To reduce the likelihood of false positive calls overly  
188 influencing genetic risk scores, variants were weighted such that if only one variant caller  
189 recognized the base pair alteration compared to reference  $CR=0.5$ . If the variant was called by



190 both the GATK and FreeBayes callers  $CR=1$ .  $FD$  scores ranged from -0.8-1.0; however, as the  
191 goal was to identify variants that were more likely to be deleterious, all negative scores were  
192 recoded to zero. Regarding zygosity for sex chromosomes, as it is difficult to determine which X  
193 chromosome is inactivated using the data available, female individuals with heterozygous  
194 variants on the X chromosome were weighted the same as autosomal variants. In addition, for X  
195 chromosome variants called as heterozygous in males, those located within Pseudoautosomal  
196 Regions (PAR) were weighted the same as autosomal variants. Male heterozygous X  
197 chromosome variants located outside of PAR1 and PAR2 were considered homozygous and  
198 were weighted as such in genetic risk scores.

199 Hg19 genomic locations of rare, inherited and validated, *de novo* CNVs previously  
200 reported in Sanders et al., 2015(11) and Krumm et al., 2015(28) that encompassed coding and  
201 regulatory regions of protein coding transcripts for ASD candidate genes were pulled from  
202 supplemental data included in these publications. Bedtools(43) was used to identify regions of  
203 overlap between CNVs reported across the previously published studies. Gene-based annotations  
204 in ANNOVAR were used to identify CNVs that encompassed portions of the coding (i.e.,  
205 exonic, splice-site) and proximal promoter (i.e., 5'-UTR) regions (Tables S4-S5). CNVs were  
206 given weights equal to SNVs and In/Dels with the strongest likelihood of being damaging based  
207 on the distribution of  $FD$  scores described above and variant weights for all CNVs were set  
208 equal to 1. The currently published data for CNVs report only the presence of a deletion or  
209 duplication in a particular genomic region but not the predicted number of copies; however  
210 deletions were expected to occur on only one chromosome(11, 28). Deletions and amplifications  
211 were assumed to occur on only one chromosome. In addition, while some CNVs were not  
212 reported for the same evaluated individual, the analysis datasets across the two prior publications

213 did not completely overlap. Therefore, whether or not both studies reported the CNV was not  
214 included in variant weights.

215 Separate genetic risk scores were then calculated for each individual to assess the  
216 likelihood of dysfunction in overall genetic mechanisms that represented unique GO-defined  
217 biological processes with overrepresentation of ASD candidate genes. We developed the  
218 following equation to calculate the likelihood of genetic dysfunction in biological processes:

$$219 \quad DBP_X = \sum \left( \left( LDV_{v1}^{GeneA} \times EBP_X^{GeneA} \right) + \left( LDV_{v2}^{GeneA} \times EBP_X^{GeneA} \right) + \left( LDV_{v1}^{GeneB} \times EBP_X^{GeneB} \right) + \dots \left( LDV_{v1}^{GeneZ} \times EBP_X^{GeneZ} \right) \right) / nvBPx$$

220

221 Where  $DBP_X$  = Dysfunction of Biological Process X and is the sum of the products of

222  $LDV_{vn}^{GeneA}$  = the likelihood that variant  $n$  is damaging to gene A, and  $EBP_X^{GeneA}$  = the sum of the  
223 frequencies of the GO evidence codes, across all genes assigned to biological process X, that  
224 were used to assign gene A to biological process X (*Fig. S1*) plus the number of assigned child  
225 terms for biological process X, divided by the total number of child terms available for biological  
226 process X.  $nvBPx$  = the number of variants assigned to biological process X. We expected that a  
227 gene having more than one likely damaging variant was increased evidence that the encoded  
228 protein product was dysfunctional. Furthermore, the size of the transcripts was not correlated  
229 with the number of variants identified in the gene ( $R^2=2.0 \times 10^{-4}$ ). Therefore, we did not correct  
230 for multiple variants per gene.

### 231 *Clustering of Biological Process Dysfunction Scores*

232 To cluster individuals based on overall genetic risk, we used an approach that we  
233 previously developed and showed was capable of identifying genetically-meaningful subgroups  
234 in ASD (44). Briefly, the correlation structure across the genetic risk scores was determined by

235 calculating pairwise Spearman's rank correlation coefficients. As score ranges varied by  
236 biological process, all scores were transformed into Hazen percentile ranks to be more  
237 comparable. To help ensure that correlated genetic risk scores did not overly influence results,  
238 Gower dissimilarity matrices were calculated using correlation-based weights with the 'FD'  
239 package v1.0-12 in R(45). The threshold for non-independence of genetic risk scores was  
240  $\rho \geq 0.50$ , or moderate to strong correlation(46). Correlated scores were weighted to allow for  
241 only partial contributions to analyses. The 'clValid' package v0.6-6 in R was used to evaluate  
242 different methods for internal validity using connectivity, silhouette width, and the Dunn index  
243 while partitioning the dissimilarity matrix into anywhere from 2 to 5 clusters(47). Clustering  
244 methods that are available for evaluation in the clValid package include: 1) agglomerative  
245 hierarchical, 2) partitioning around medoids, 3) self-organizing tree algorithm, 4) model-based,  
246 5) divisive hierarchical, and 6) fuzzy k-means. The final clustering solution was performed using  
247 the agglomerative hierarchical method via the 'cluster' package v2.0.7-1 in R(48). Final cluster  
248 solution validity was assessed by performing 1,000 data permutations and comparing clustering  
249 of real versus permuted genetic risk scores with the Adjusted Hubert-Arabie Rand index(49).  
250 Sensitivity and regression analyses were performed to determine if dysfunction in any particular  
251 biological process was important to definition of the final cluster solutions. Chi-square tests were  
252 used to determine if having variants with  $LDV > 0$  in any particular gene was associated with  
253 assignment of individuals to genetic clusters.

#### 254 *Differences in ASD-Related Phenotype Variables Based on Genetic Subgroup*

255 Phenotype variables representing quantitative or ordinal severity measures for symptoms  
256 assessed in the SSC standard phenotype battery and medical history intakes were downloaded  
257 directly from SFARI Base (<https://base.sfari.org/>) and were available for the majority of the ASD

258 probands included in the genetic data analyses (99.66%, n=2,373). For more information on  
259 symptom severity measurements used for the SSC see Fischbach and Lord, 2010(23). When  
260 available, normalized z-scores or age-standardized scores were used. Head circumferences were  
261 transformed to z-scores by standardizing for age and sex using a typically developing  
262 population(50). Sleep duration was determined using current answers to the question “On  
263 average, how many hours/night [does your child sleep]?” obtained from the medical history  
264 intakes as described in our previous study(51). Student’s t-tests were used to compare mean  
265 scores for symptom severity measures, that were available for at least half of the analysis dataset,  
266 between the individuals assigned to genetic clusters. Age was not associated with measures that  
267 were significantly different between clusters ( $p \geq 0.43$ ). For measures with sex-specific  
268 differences, additional t-tests were conducted that were stratified by sex. Chi-square tests were  
269 used to determine if having variants with  $LDV > 0$  in any particular gene was associated with  
270 assignment to the genetic clusters. Logistic regression was used to test if having variants with  
271  $LDV > 0$  in cluster-associated genes was associated with: 1) individuals with ASD compared to  
272 unaffected siblings in all races and only in white individuals, 2) increased risk for intellectual  
273 disability ( $IQ < 70$ ) or reports of irritable bowel syndrome while adjusting for gender and race.  
274 False discovery rate was controlled for using the Benjamini-Hochberg procedure(52).

275 Principal Component Analysis (PCA) was conducted while applying correlation-based  
276 weights to allow only partial contributions of moderately-strongly correlated phenotype variables  
277 ( $\rho \geq 0.50$ ), similar to that described for clustering of genetic risk scores. Phenotype variables  
278 were transformed to Hazen percentile ranks prior to PCA. PCA was conducted without scaling as  
279 variables did not contribute equal weights. The number of dimensions of the PCA was estimated

280 via cross-validation. PCA was then performed on percentile ranked phenotype data using the  
281 ‘FactoMineR’ package v1.41 in R(53).

## 282 **Results**

### 283 *Novel Approach Calculates Dysfunction in Biological Processes Underlying ASD*

284 At the time of these analyses, there were 989 different protein coding ASD risk genes  
285 included in the Autism Informatics Portal (December 2017 update). 2,482 Gene Ontology  
286 (GO)(54, 55) biological processes defined for humans were overrepresented for ASD risk genes  
287 based on a significance threshold of  $p < 0.05$ ; 16 terms had the lowest possible p-values ( $p < 1 \times 10^{-30}$ ;  
288 *Fig. 1, Table S1*). Of the 16 top overrepresented terms, four GO terms – nervous system  
289 development (GO:0007399), synaptic signaling (GO:0099536), cognition (GO:0050890), and  
290 regulation of membrane potential (GO:0042391) – represented unique processes. There were 400  
291 ASD candidate genes with evidence for involvement in at least one of these four biological  
292 processes. The genes that remained unassigned to any process were overrepresented in the  
293 chromosome organization process (GO:0051276,  $p = 7.10 \times 10^{-12}$ ; *Fig. 1, Table S1*). An additional  
294 82 genes were evidenced to be involved in chromosome organization. There were no unique  
295 biological processes with evidence of overrepresentation for the remaining 507 unassigned ASD  
296 candidate genes (*Table S1, Fig. S2*). The overlap in ASD risk genes assigned the five  
297 overrepresented biological processes representing unique terms is shown in Figure S3A.

298 There were 2,077 unique SNVs and In/Dels predicted by Variant Effect Predictor (VEP)  
299 to be damaging (*Table S3*). Predictions of variant effects based on nine other algorithms that use  
300 information in addition to genetic location indicated that 730 of the 2,077 variants were more  
301 often predicted damaging compared to benign (i.e.,  $LDV > 0$ ). The majority of the individuals  
302 in the analysis dataset ( $n = 2,295$ , 96.35%) had a variant with  $LDV > 0$  in an ASD risk gene. On

303 average, there were ~15 variants [ $\mu=14.6(5.3)$ ] observed per individual that was predicted to be  
304 damaging more often than benign, and ~11 different [ $\mu=11.3, (4.2)$ ] ASD candidate genes per  
305 person with possibly damaging variants. None of the variants that were *de novo* were predicted  
306 to be benign and inherited variants were more often predicted to be damaging if the consequence  
307 related to a frameshift, splice-site alteration, or incorporation of a premature stop codon (*Fig. 2*).  
308 Screening data reported in previous studies(11, 28) for *de novo* and rare, inherited structural  
309 variation in the SSC dataset identified 572 unique Copy Number Variants (CNVs) encompassing  
310 coding regions or proximal promoter elements of 354 ASD candidate genes (*Tables S4-S5*).  
311 There were 546 individuals in the analysis dataset with  $\geq 1$  CNV that was likely to cause  
312 dysfunction in  $\geq 1$  ASD candidate gene; 292 CNVs encompassed more than one gene. In total,  
313 there were 751 currently implicated genes with either a SNV, In/Del or CNV with  $LDV > 0$ . Of  
314 these, 355 were assigned to at least one unique process that was overrepresented for ASD risk  
315 genes (*Fig. S3B*).

316 Most individuals in the dataset (98.1%) had evidence indicating genetic dysfunction in  
317 more than one of the evaluated biological processes. There were five individuals with evidence  
318 for dysfunction only in nervous system development, 35 with evidence for dysfunction only in  
319 chromosome organization, and five with no evidence for dysfunction in any of the evaluated  
320 processes. Scores for dysfunction in nervous system development, synaptic signaling, and  
321 regulation of membrane potential were moderately to strongly correlated. Scores reflecting  
322 dysfunction in cognition and chromosome organization were weakly correlated with each other  
323 and other scores (*Fig. 3A*).

324 A clustering analysis was then performed on  $DBP_x$  scores reflecting the likelihood of  
325 genetic dysfunction in each of the five unique biological processes. Agglomerative hierarchical

326 clustering identified two valid subgroups of individuals ( $n_{\text{Cluster 1}}=1,485$ ,  $n_{\text{Cluster 2}}=896$ ) (*Fig. 3B*,  
327 *Fig. S4*). This solution was significantly different from clustering permuted datasets  
328 (HubertArabieRandIndex= $-1.2 \times 10^{-4}$ ), further evidence supporting validity of the clustering  
329 analysis. Sensitivity analyses indicated that scores reflecting genetic dysfunction in the cognition  
330 biological process had the strongest influence on the stability of the clusters (*Fig. 3C*). Notably,  
331 all of the individuals assigned to the smaller cluster had evidence of dysfunction in genes  
332 involved in cognition ('cognition gene dysfunction cluster') while none of the individuals  
333 assigned to the larger cluster had evidence for dysfunction in these genes (*Fig. 3D*).

### 334 *Three Cognition Genes are Associated with Distinct ASD Genetic Subgroup*

335       Of the 61 cognition genes with likely damaging variants identified in the SSC dataset,  
336 there were three genes (*PTGS2*, *ABCA7*, and *SHANK3*) that were strongly associated with  
337 assignment to the cognition gene dysfunction cluster (*Table 1A*, *Table S6*). There were 196  
338 individuals who were heterozygous for a stop-gain variant in exon 4 (rs200314986; transcript  
339 ENST00000367468.9:c.366C>A, ENSP00000356438.5:p.Tyr122Ter) of the *prostaglandin-*  
340 *endoperoxide synthase 2* (*PTGS2*) gene, which results in a shortened transcript that is missing  
341 the final 6 exons. This variant was more frequent in individuals with ASD compared to  
342 unaffected siblings (*Table 1B*). There were 17 different likely damaging variants observed in 280  
343 individuals in the *ATP Binding Cassette Subfamily A Member 7* (*ABCA7*) gene. These included  
344 six frameshifts, four splice-sites, four stop-gains, one stop-loss, one inherited deletion of the first  
345 11 exons (CNV size=18.7kb), and one inherited amplification encompassing exons 27-40 (CNV  
346 size=4.5kb). For the *SH3 and multiple ankyrin repeat domains 3* (*SHANK3*) gene, there were 294  
347 individuals who were heterozygous for a splice-site variant (rs150909992) that changes the 5'

348 end of an intron in transcript variant ENST00000445220.2, and two individuals with *de novo*  
349 CNVs that deleted the entire coding region (CNV sizes>3Mb).

### 350 *Individuals with Cognition Gene Variants Have More Severe Symptoms*

351         Among the 27 ASD-related symptom measures that were available for at least half of the  
352 dataset (*Table S7*), the severity of social impairment based on teacher reports on Social  
353 Responsiveness Scales (SRS-TR), intelligence quotient (IQ) scores, personal and social skills  
354 measured using composite standard scores from the Vineland Adaptive Behavior Scales,  
355 receptive vocabulary measured via the Peabody Picture Vocabulary Test, and the severity of  
356 ASD-related abnormalities exhibited by 36 months of age (i.e., Developmental Abnormality  
357 scores) from the Autism Diagnostic Interview-Revised (ADI-R) were different between the  
358 genetic clusters (*Fig. 4A, Table S8A*). After false discovery rate corrections, the observations that  
359 individuals with dysfunction in cognition genes had increased severity of social impairment  
360 reported by teachers on the SRS-TR and reduced IQs remained significant (*Fig 4A, Table S8A*).  
361 Notably, both nonverbal and verbal IQ scores were lower in the genetic subgroup defined by  
362 dysfunction in cognition genes (*Fig 4A, Table S8B*). Sex-stratified mean comparisons indicated  
363 that differences between the genetic clusters for SRS-TR scores and verbal IQs were more  
364 significant in males compared to females (*Table S8C*).

365         To determine how much of the overall variability in ASD symptomatology was explained  
366 by symptoms that were different between the genetically distinct subgroups, principal  
367 components analysis (PCA) was conducted, while adjusting for correlated variables, on  
368 phenotype data from the subset of the dataset with all evaluated measures (n=543). Five principal  
369 components (PCs) were able to define the majority of the variability in symptoms (cumulative  
370 percentage of variance=46.97%). Of the 27 measures evaluated, teacher reports on SRS-TR were



371 the 5<sup>th</sup> strongest contributor to the cumulative variability defined by the first component of the  
372 data (*Fig. 4B, Fig. S5*). The strongest correlation for SRS-TRs ( $\rho=0.39$ ) was with the variable  
373 which contributed the most to explaining the phenotypic heterogeneity defined by PC1, social  
374 and communication impairment observed via the Autism Diagnostic Observation Schedule (*Fig.*  
375 *4C, Figs. S5-S6*). Full scale IQs were the 6<sup>th</sup> strongest contributor to the variability defined by  
376 PC1 (*Fig. 4B, Fig. S5*). Full scale IQ scores were moderately correlated with scores for dexterity  
377 (Purdue Pegboard Test,  $\rho=0.45$ ; *Fig 4C*) and language acquisition (non-word repetition task,  
378  $\rho=0.48$ ; *Fig. 4C*) which were the 3<sup>rd</sup> and 4<sup>th</sup> largest contributors to PC1, respectively (*Fig. S5*).

379 Of the top three genes associated with assignment to the ‘cognition dysfunction cluster’,  
380 the stop-gain variant in the *PTGS2* gene was associated with increased risk for having an IQ  
381 score reflecting intellectual disability (*Table 2A*) and reports of comorbid irritable bowel  
382 syndrome, when adjusting for sex and race (*Table 2B*). The majority of the individuals with  
383 ASD, and all of the unaffected siblings with the variant inherited it from at least one parent.  
384 There were six individuals with ASD whose parents did not appear to have the variant.

## 385 **Discussion**

### 386 *Novel Approach Identified Clinically-Relevant Genes to Prioritize for Functional Follow-up*

387 Beginning with all 989 ASD candidate genes included in the December 2017 update of  
388 the AutDB Autism Informatics Portal, our approach identified a subset of 61 genes involved in  
389 cognition that were useful to defining a cluster of individuals with more severe teacher reported  
390 social impairment, lower IQ scores, and reduced daily living skills. We then identified three  
391 genes (i.e., *PTGS2*, *ABCA7*, and *SHANK3*) with likely damaging variants that were strongly  
392 associated with this ASD subgroup. This helped us to pinpoint the specific gene and variant that  
393 was associated with expression of important comorbidities in ASD, including intellectual

394 disability and irritable bowel syndrome. In particular, a stop-gain variant in the *PTGS2* gene  
395 (rs200314986) encoding Cyclooxygenase-2 (COX2) – a target for non-steroidal anti-inflammatory  
396 drugs (NSAIDs) – was more frequent in individuals with ASD compared to unaffected siblings.  
397 The support for *PTGS2* as a candidate gene for ASD resides in the results of a small gene-centric  
398 association study(56). As such, it is considered to have weak evidence for an association with  
399 ASD based on the cumulative strength of evidence for individual variants in that gene as defined  
400 in the AutDB Autism Informatics Portal. Our work provides additional support not only for a  
401 relationship between the *PTGS2* gene and ASD risk but also for increased risk of intellectual  
402 disability in ASD. Notably, the encoded enzyme is involved in serotonergic synaptic  
403 transmission and oxytocin signaling, which are known to be impaired in some individuals with  
404 ASD(57-60). While not this specific variant, there are 13 other pathogenic variants reported in  
405 this gene (<https://www.ncbi.nlm.nih.gov/clinvar/>) relating to developmental abnormalities.  
406 *PTGS2* is also considered a very important pharmacogene by PharmGKB and has strong  
407 implications for functional follow-up studies and eventual translation to improve clinical care(61,  
408 62). There are a number of variants reported in this gene that have been shown to influence  
409 individual response to NSAIDs in the typically developing population(61). Given the evidence  
410 that long-term use of NSAIDs has been linked to gastrointestinal issues(63), we also tested for  
411 and observed that individuals with the *PTGS2* stop-gain variant had increased risk for reports of  
412 irritable bowel syndrome. It is possible that drugs that selectively inhibit COX-2, as well as  
413 traditional NSAIDs that target COX-2 and COX-1 (e.g., ibuprofen) may be less effective in  
414 individuals with this loss-of-function variant. This indicates that it may be useful to test for the  
415 rs200314986 variant in individuals with ASD to help improve treatment for pain and avoid  
416 exacerbation of gastrointestinal issues.

417 Variants in *ABCA7* were not strongly associated with ASD. Notably, there were 17  
418 different likely damaging variants identified in this gene. This suggests that *ABCA7* may be more  
419 tolerant to loss of function mutations. We looked at loss intolerance scores (pLI), available via  
420 DECIPHER (<https://decipher.sanger.ac.uk/>) which assess the probability that a gene is intolerant  
421 to a loss of function mutation(64). These scores indicate that *ABCA7* may tolerate deleterious  
422 variants (pLI=0.0). In comparison, there was only one stop-gain variant in *PTGS2* and three  
423 different variants (one splice-site and two CNVs) in *SHANK3*. *PTGS2* and *SHANK3* are  
424 predicted to be extremely intolerant (pLI for both genes=1.00) to loss of function mutations.

425 Unexpectedly, *SHANK3* variants were associated with decreased risk for ASD. *SHANK3*  
426 is considered a strong candidate gene for ASD and haploinsufficiency of *SHANK3* is implicated  
427 in Phelan-McDermid syndrome which is often comorbid with ASD and characterized by delayed  
428 speech and intellectual disability(65). Notably, as we conducted gene-based tests our results were  
429 likely driven by a splice-site variant (rs150909992) that was observed to be heterozygous in 294  
430 individuals, and not by the two CNVs. The splice-site variant was identified based on the VEP  
431 consequence from a previous assembly of the reference human genome (GRCh37.p13). This  
432 variant was not predicted by any of the other algorithms tested. In the most recent update of  
433 Ensembl (GRCh38.p10), this variant is no longer predicted to be a splice-site variant for a  
434 protein coding transcript of *SHANK3*. The transcript it affects corresponds to *SHANK3-202*  
435 which is now evidenced to encode a non-coding RNA. It is possible that this variant has no effect  
436 on the *SHANK3* protein, which may explain why we did not see significant effects of having a  
437 likely damaging variant in *SHANK3* on risk for ASD or intellectual disability. It may instead  
438 have regulatory effects on other genes, as there is evidence that some non-coding RNAs are  
439 functional(66), and it is located in a promoter flanking region which is active in neuronal

440 progenitor cells (ENSR00000147759). This is an excellent example of why it is important to  
441 consider that solely using the genetic location of the variant is potentially misleading in the ever-  
442 changing landscape of human genetics.

#### 443 *Multiple Prediction Algorithms are Necessary for Efficient Identification of Damaging Variants*

444 By evaluating damaging variant predictions from multiple algorithms, we were able to  
445 identify the variants (whether *de novo* or inherited, rare or common) in ASD risk genes with  
446 more evidence to be damaging to the encoded protein function. It is unclear what the optimal  
447 approach is for *in silico* prediction of the likelihood a genetic variant is damaging to the encoded  
448 protein product(21, 33, 67). Predictions from available tools vary widely when applied to the  
449 same variant as they employ different algorithms and use different training data to determine the  
450 accuracy of predictions(68). As such, it is highly advisable to combine predictions from multiple  
451 tools to assess the overall likelihood a variant is damaging(69). We observed that ~13% of the  
452 SNVs and In/Dels that were expected to have a negative consequence on the encoded protein  
453 based on genetic location (i.e., the VEP prediction) were more often predicted to be benign by  
454 algorithms that incorporated additional information (e.g., the frequency of the variant in  
455 populations with no evidence of disease, the level of conservation of the genetic region across  
456 species). As such, if we had chosen to focus solely on VEP consequence predictions, we would  
457 have overestimated the likelihood of genetic dysfunction in the evaluated biological process. In  
458 addition, over half of the variants (52%) that were located in a genetic region that was likely to  
459 be damaging were not given predictions by any other algorithm. This is possibly because the  
460 variant being evaluated has not been observed in the populations that are used for training  
461 prediction algorithms. As such, it is currently difficult to determine the likelihood that an  
462 extremely rare variant is damaging without conducting functional follow-up studies. Only 0.14%

463 of the variants that VEP predicted to be highly likely of damaging the protein product based on  
464 the location in the coding region of the gene were predicted to be damaging by all of the other  
465 nine prediction algorithms evaluated. Fortunately, as the field of *in silico* variant prediction  
466 continues to develop novel methods, focused on advances like mapping variants to three-  
467 dimensional protein structures(70), predictions should become more accurate and variant  
468 prioritization more efficient.

#### 469 *Evidence of Intra-Individual Genetic Dysfunction in Multiple Biological Processes*

470 The majority of the evaluated individuals had a variant in an ASD candidate gene that  
471 was predicted more often to be damaging compared to benign. By using these variants to  
472 calculate dysfunction in overall biological processes, we also observed that the majority of  
473 individuals had evidence of dysfunction in more than one process important to ASD etiology.  
474 The unique terms that were selected reflect validations of results from previous studies  
475 implicating genes involved in neural development, synaptic signaling, and chromosome  
476 packaging(10, 11). In addition, ASD risk genes were overrepresented in processes that encode  
477 the mental activities related to thinking, learning and memory (i.e., cognition) and regulate the  
478 difference in electric potential between the intra- and extra-cellular environments (i.e., regulation  
479 of membrane potential). While all of these processes had some degree of overlap in genes with  
480 likely damaging variants, there were also genes with variants that were uniquely assigned to only  
481 one process suggesting some genetic factors influencing these processes are distinct. Not  
482 surprisingly, individuals with more evidence for genetic dysfunction in development of the  
483 nervous system also had more evidence for dysfunction in the regulation of membrane potential  
484 and synaptic signaling. Dysfunction in genes influencing chromosome organization appeared  
485 independent from other processes. This provides additional support that mechanisms of

486 chromosome organization may contribute independently from genes influencing neurological  
487 function to increase risk for ASD(10, 11). Notably, predicted dysfunction in cognition genes  
488 robustly identified a genetically-distinct subgroup of individuals with ASD. Many of these genes  
489 are evidenced to be involved in human cognition because they are implicated in intellectual  
490 disability, dementia, executive function, long-term memory, and a number of aspects of learning  
491 (for details see <http://amigo.geneontology.org/amigo/term/GO:0050890>). These genes may be  
492 particularly relevant to developing more comprehensive genetic screening panels for ASD.

493 *Individuals with More Cognition Gene Dysfunction Have More Severe ASD Symptoms*

494 The genetic subgroup defined primarily based on evidence of cognition gene dysfunction had  
495 increased severity of social impairment as measures via teacher reports on the Social  
496 Responsiveness Scale (SRS-TR)(71). Previous studies of families with more than one child  
497 diagnosed with ASD (i.e., multiplex) have observed that SRS scores are heritable, and linked to  
498 loci on a number of different chromosomes(72-74). SRS scores are observed to have differential  
499 distributions when comparing male and female individuals with ASD(72), and simplex versus  
500 multiplex families(75). Our results indicate that genetic factors influence social impairment  
501 measured via the SRS in simplex families, primarily in males. It is not clear why the  
502 observations are limited to teacher reports and do not extend to parent reports on the SRS-PR.  
503 We observed weaker correlations between parent and teacher reports on the SRS than has been  
504 previously reported(76). It is possible that these results reflect the highly variable symptom  
505 severity of the subjects in the SSC as concordance between teacher and parent reports is  
506 influenced by severity of ASD with higher concordance as ASD severity increases(77).  
507 Moreover, many studies have observed that parents rate their children as being more impaired  
508 compared to teachers possibly due to the context of the social setting in which the child is being

509 observed(78). Notably, teacher reports on the SRS-TR were more correlated with social affect  
510 measured on the Autism Diagnostic Observation Schedule ( $\rho=0.39$ ) when compared to SRS-PR  
511 parent reports ( $\rho=0.21$ ) suggesting better agreement between teacher-reported and clinician-  
512 observed social impairment on average. Notably, PCA indicated that clinician-observed  
513 social/communication deficits measured via the Autism Diagnostic Observation Schedule  
514 (ADOS) were the largest contributors to the overall variability in quantitative ASD-related  
515 symptoms measured in the evaluated dataset and SRS-TR scores were among the top five.

516         Verbal and nonverbal IQ scores were also reduced in individuals with evidence of  
517 cognition gene dysfunction compared to those without. This was independent of social  
518 impairment measured via the SRS-TR, suggesting that individuals with more social impairment,  
519 and lower nonverbal and verbal IQ [as opposed to an ‘IQ split’(79)] have genetic differences  
520 compared to individuals with less social and intellectual impairment or discordance between  
521 these two measures (e.g., higher IQs with more social impairment). Previous studies have also  
522 observed that social deficits ascertained by the SRS are generally unrelated to IQ(71, 80).

### 523 *Limitations*

524         Notably, many ASD candidate genes with likely damaging variants were assigned to  
525 more than one unique biological process. Therefore, to calculate scores for dysfunction in overall  
526 processes, genes with likely damaging variants were weighted to account for 1) the level of  
527 evidence supporting assignment of the gene to the biological process of interest, and 2) the  
528 proportion of the child terms of the unique biological process to which the gene was also  
529 assigned. For each gene assigned to a particular biological process, GO provides evidence codes  
530 that indicate the type of evidence supporting this assignment  
531 (<http://www.geneontology.org/page/guide-go-evidence-codes>). It is unclear what should be

532 considered the most reliable sources of evidence supporting assignment of genes to GO Terms.  
533 While experimental evidence would be preferred, it is potentially biased, as this code will likely  
534 be assigned more often to genes that are directly evaluated for a role in the process of interest  
535 and not genes that have yet to be experimentally assessed for a role in the process. The majority  
536 of genes are assigned to terms based on computational predictions that have been observed to be  
537 generally reliable in the absence of experimental data(81). To avoid bias in gene process  
538 assignment, weights were calculated for each gene to account for the level of evidence it was  
539 correctly assigned to the process. It is possible that this approach under- or over-estimated the  
540 level of biological process dysfunction.

541         It is also possible that by focusing on currently implicated ASD risk genes we did not  
542 take into account all evidence for genetic dysfunction in a process. Future work aimed at  
543 understanding genetic contributions to overall process dysfunction, regardless of the underlying  
544 evidence of genetic risk for ASD may help detect more robust differences in ASD-related  
545 symptoms. In lieu of these potential limitations, the approach we developed helped identify the  
546 variants in ASD risk genes with more evidence to be damaging to the encoded protein function.  
547 This approach was also able to identify subsets of candidate genes with common underlying  
548 biology that are dysfunctional in individuals with ASD and related to differences in  
549 symptomatology. Notably, an inherited stop-gain variant in *PTGS2* was prioritized which has  
550 strong implications for functional follow-up studies and may be a novel treatment target. This  
551 work constitutes a translational bioinformatics approach beneficial to gleaning clinically-useful  
552 information from whole-exome data and could be adapted and applied to identification of  
553 clinically-relevant genetic factors for a number of complex human disorders.

554



555 **Supplemental Data description:**

556 Supplemental Data include six figures and eight tables.

557 **Acknowledgments:** This work was supported by a National Library of Medicine grant K01-  
558 LM012870 [OJV] and the Simons Foundation (SFARI) [JSS, ZEW]. We are grateful to all of the  
559 families at the participating Simons Simplex Collection (SSC) sites, as well as the principal  
560 investigators (A. Beaudet, R. Bernier, J. Constantino, E. Cook, E. Fombonne, D. Geschwind, R.  
561 Goin-Kochel, E. Hanson, D. Grice, A. Klin, D. Ledbetter, C. Lord, C. Martin, D. Martin, R.  
562 Maxim, J. Miles, O. Ousley, K. Pelphrey, B. Peterson, J. Piggot, C. Saulnier, M. State, W. Stone,  
563 J. Sutcliffe, C. Walsh, Z. Warren, E. Wijsman). We appreciate obtaining access to phenotypic  
564 and genetic data on SFARI Base. Approved researchers can obtain the SSC population dataset  
565 described in this study (<https://www.sfari.org/resource/simons-simplex-collection/>) by applying  
566 at <https://base.sfari.org>.

567 **Declaration of Interests**

568 The authors have no conflicts of interest to declare.

569 **Figure Legends**

570 **Figure 1. Selection of unique biological processes with overrepresentation of ASD**  
571 **candidate genes for further study.** Shown is the distribution of significant terms in the GO  
572 structure for biological processes (GO:0008150). Terms highlighted in yellow indicate unique  
573 terms selected due to their place in the hierarchy and meaningfulness to ASD etiology. Terms  
574 highlighted in blue indicate significant processes considered too broad to be meaningful and  
575 green indicates significant child terms with complete genetic overlap to unique terms. Sig=the  
576 number of ASD candidate genes assigned to the process, Exp=the expected number of genes  
577 assigned by chance. \*denotes terms that were significant at Fisher's exact  $FDR < 1.0 \times 10^{-30}$   
578 following the primary analysis of all 989 ASD risk genes, \*\* denotes terms that were significant  
579 at Fisher's exact  $FDR$  ranging from  $3.5 \times 10^{-17}$  to  $7.1 \times 10^{-12}$  following the secondary analysis run  
580 on genes unassigned to the top processes. Black lines connect terms that regulate each other, blue  
581 lines connect terms that are part of each other.

582  
583 **Figure 2. Proportion of VEP consequences predicted to be damaging based on nine**  
584 **prediction algorithms.** Inherited variation resulting in frameshifts, splice-site and stop gains  
585 were more often predicted damaging compared to benign, while variants predicted to cause the  
586 loss of either stop or start sites were equally or more often predicted to be benign. *De novo*  
587 variants, regardless of the consequence were more often damaging.

588  
589 **Figure 3. Clustering individuals based on overall biological process dysfunction. A)**  
590 Correlation across scores reflecting dysfunction in biological processes with overrepresentation  
591 of ASD candidate genes indicates many individuals have dysfunction in  $>1$  process. **B)**  
592 Clustering identified two distinct subgroups of individuals with more similar scores for overall  
593 biological process dysfunction (agglomerative coefficient=0.96). **C)** Sensitivity analyses indicate  
594 removing the scores had the strongest effect on stability of the clustering solution. APN=average

595 proportion of non-overlap, AD=average distance, ADM=average distance between means,  
596 FOM=figure of merit. **D)** Evidence of dysfunction in genes involved in cognition primarily  
597 defined separation of individuals into either cluster 1 (no cognition gene dysfunction) or cluster 2  
598 (cognition gene dysfunction).

599  
600 **Figure 4. Relationship between genetic and phenotypic differences.** **A)** T-tests comparing  
601 differences in the 27 quantitative ASD-related symptom measures between genetic clusters  
602 identified that social impairment was more severe and IQs and daily living skills were reduced in  
603 the cognition gene dysfunction cluster. **B)** Principal components analysis, while adjusting for  
604 correlations, of all 27 symptom measures identified that symptoms that were different between  
605 the genetic clusters majorly contributed to overall phenotype variability (as defined by  
606 Dimension 1). Black indicates symptom differences that remained significant ( $FDR \leq 0.04$ )  
607 following multiple testing correction, gray indicates symptom differences based on an unadjusted  
608 significance threshold ( $p \leq 0.03$ ), and unlabeled arrows indicate symptoms that were not different  
609 but had strong contributions to phenotype variability. **C)** Significant ( $p < 0.05$ ) correlations are  
610 shown indicating that absolute values for many symptoms that were different between genetic  
611 clusters were correlated with those contributing majorly to overall phenotype variability.  
612

613 **Tables:**

614 **Table 1A. Genes associated with the cognition gene dysfunction cluster**

| Genetic Cluster    | <i>PTGS2</i>           |         | <i>ABCA7</i>           |          | <i>SHANK3</i>          |          |
|--------------------|------------------------|---------|------------------------|----------|------------------------|----------|
|                    | No Variant             | Variant | No Variants            | Variants | No Variants            | Variants |
| Cluster 1 Observed | 1,485                  | 0       | 1,485                  | 0        | 1,485                  | 0        |
| Expected           | 1,363                  | 122     | 1310                   | 175      | 1,300                  | 185      |
| Cluster 2 Observed | 700                    | 196     | 616                    | 280      | 600                    | 296      |
| Expected           | 822                    | 74      | 791                    | 105      | 785                    | 111      |
| Total              | 2185                   | 196     | 2,101                  | 280      | 2085                   | 296      |
| Pearson $\chi^2$   | 353.98                 |         | 525.91                 |          | 560.23                 |          |
| Fisher's exact     | $<1.0 \times 10^{-32}$ |         | $<1.0 \times 10^{-32}$ |          | $<1.0 \times 10^{-32}$ |          |

615 **Table 1B. Association of cluster-associated cognition genes with Autism Spectrum Disorder**

| ASD Diagnosis                      | <i>PTGS2</i>         |         | <i>ABCA7</i>         |          | <i>SHANK3</i>         |          | Total |
|------------------------------------|----------------------|---------|----------------------|----------|-----------------------|----------|-------|
|                                    | No Variant           | Variant | No Variants          | Variants | No Variants           | Variants |       |
| All Reported Races                 |                      |         |                      |          |                       |          |       |
| ASD                                | 2,185                | 196     | 2,101                | 280      | 2,085                 | 296      | 2,381 |
| Unaffected Siblings                | 1,700                | 100     | 1,602                | 198      | 1,431                 | 396      | 1,800 |
| Odds Ratio (95% C.I.) <sup>†</sup> | 1.52 (1.18, 1.97)    |         | 1.08 (0.88, 1.31)    |          | 0.55 (0.46, 0.65)     |          |       |
| p-value                            | $5.0 \times 10^{-4}$ |         | $2.4 \times 10^{-1}$ |          | $<1.0 \times 10^{-5}$ |          |       |
| FDR                                | $7.5 \times 10^{-4}$ |         | $2.4 \times 10^{-1}$ |          | $3.0 \times 10^{-5}$  |          |       |
| Reported White Race                |                      |         |                      |          |                       |          |       |
| ASD                                | 1,644                | 184     | 1,634                | 194      | 1,594                 | 234      | 1,828 |
| Unaffected Siblings                | 1,280                | 85      | 1,240                | 125      | 1,095                 | 270      | 1,365 |
| Odds Ratio (95% C.I.) <sup>†</sup> | 1.69 (1.28, 2.23)    |         | 1.18 (0.92, 1.50)    |          | 0.60 (0.49, 0.72)     |          |       |
| p-value                            | $1.0 \times 10^{-4}$ |         | $9.7 \times 10^{-2}$ |          | $<1.0 \times 10^{-5}$ |          |       |
| FDR                                | $1.5 \times 10^{-4}$ |         | $9.7 \times 10^{-2}$ |          | $3.0 \times 10^{-5}$  |          |       |

616 Of the 61 genes used to calculate *DBP*<sub>Cognition</sub> scores, **A)** three genes were significantly associated  
617 with assignment of individuals to the cluster with evidence for dysfunction in cognition genes  
618 (i.e., Genetic Cluster 2). **B)** In particular, a variant in *PTGS2* was more frequent in individuals  
619 with ASD compared to unaffected siblings. Tests were conducted in all individuals and only in  
620 individuals with white race reported to account for potential influences of population  
621 stratification. <sup>†</sup>Odds ratios denote the likelihood for an individual to have an ASD diagnosis  
622 given the presence of any likely damaging variant in *SHANK3*, or *ABCA7*, or the T-allele (i.e. a  
623 stop-gain variant) in *PTGS2*.

624  
625  
626

627 **Table 2A. Association of cognition gene variants with intellectual disability in ASD**

| Cognition Gene | Chr      | z (df=2262) | Odds Ratio (95%C.I.)                                                             | p-value                                |
|----------------|----------|-------------|----------------------------------------------------------------------------------|----------------------------------------|
|                |          |             | <b>1.40 (1.02, 1.92)</b>                                                         |                                        |
| <i>PTGS2</i>   | 1q31.1   | 2.05        | <b>2.08 (1.75, 2.40)<sup>Het</sup></b><br><b>3.01 (2.65, 3.38)<sup>Hom</sup></b> | <b>0.040</b>                           |
| <i>ABCA7</i>   | 19p13.3  | 1.07        | 1.16 (0.88, 1.53)                                                                | 0.287 <sup>631</sup>                   |
| <i>SHANK3</i>  | 22q13.33 | 1.56        | 1.24 (0.95, 1.62)                                                                | 0.119 <sup>632</sup><br><sup>633</sup> |

634

635 **Table 2B. Association of *PTGS2* variant with irritable bowel syndrome in ASD**

| Cognition Gene | Chr    | z (df=2264) | Odds Ratio (95%C.I.)                                                 | p-value |
|----------------|--------|-------------|----------------------------------------------------------------------|---------|
|                |        |             | 5.38 (1.85, 15.58)                                                   | 0.002   |
| <i>PTGS2</i>   | 1q31.1 | 3.10        | 2.01 (1.70, 2.33) <sup>Het</sup><br>2.94 (2.59, 3.30) <sup>Hom</sup> |         |

636 All tests were adjusted for sex and race. **A)** Odds ratios denote the risk for having a full scale IQ  
 637 score <70 (n=690) compared to a full scale IQ ≥70 (n=1,638) given any likely damaging variant  
 638 in the tested gene. Likely damaging variants were defined as those that were more often  
 639 predicted damaging when comparing results from 10 different prediction algorithms. More than  
 640 one of these variants was identified in *ABCA7* and *SHANK3*. For *PTGS2*, results of ordered  
 641 logistic regression are shown testing effects of heterozygosity (het) or homozygosity (hom) for a  
 642 stop-gain variant. df=degrees of freedom.; Chr=chromosomal location of gene. **B)** Odds ratios  
 643 denote increased risk for an individual to have reports of irritable bowel syndrome (n=17) given  
 644 the stop-gain variant in *PTGS2*.

645

## References and Notes:

- 646  
647  
648 1. A. P. Association, *Diagnostic and Statistical Manual of Mental Disorders. 5th ed.* .  
649 (American Psychiatric Association, Washington DC, 2013).
- 650 2. J. L. Matson, M. Shoemaker, Intellectual disability and its relationship to autism  
651 spectrum disorders. *Research in developmental disabilities* **30**, 1107 (Nov-Dec, 2009).
- 652 3. E. Y. Hsiao, Gastrointestinal issues in autism spectrum disorder. *Harvard review of*  
653 *psychiatry* **22**, 104 (Mar-Apr, 2014).
- 654 4. G. Ramaswami, D. H. Geschwind, Genetics of autism spectrum disorder. *Handbook of*  
655 *clinical neurology* **147**, 321 (2018).
- 656 5. P. Chaste, K. Roeder, B. Devlin, The Yin and Yang of Autism Genetics: How Rare De  
657 Novo and Common Variations Affect Liability. *Annual review of genomics and human*  
658 *genetics* **18**, 167 (Aug 31, 2017).
- 659 6. E. Lacivita, R. Perrone, L. Margari, M. Leopoldo, Targets for Drug Therapy for Autism  
660 Spectrum Disorder: Challenges and Future Directions. *Journal of medicinal chemistry* **60**,  
661 9114 (Nov 22, 2017).
- 662 7. L. de la Torre-Ubieta, H. Won, J. L. Stein, D. H. Geschwind, Advancing the  
663 understanding of autism disease mechanisms through genetics. *Nature medicine* **22**, 345  
664 (Apr, 2016).
- 665 8. S. LeClerc, D. Easley, Pharmacological therapies for autism spectrum disorder: a review.  
666 *P & T : a peer-reviewed journal for formulary management* **40**, 389 (Jun, 2015).
- 667 9. N. N. Parikshak, M. J. Gandal, D. H. Geschwind, Systems biology and gene networks in  
668 neurodevelopmental and neurodegenerative disorders. *Nature reviews. Genetics* **16**, 441  
669 (Aug, 2015).
- 670 10. D. Pinto, E. Delaby, D. Merico, M. Barbosa, A. Merikangas, L. Klei, B.  
671 Thiruvahindrapuram, X. Xu, R. Ziman, Z. Wang, J. A. Vorstman, A. Thompson, R.  
672 Regan, M. Pilorge, G. Pellecchia, A. T. Pagnamenta, B. Oliveira, C. R. Marshall, T. R.  
673 Magalhaes, J. K. Lowe, J. L. Howe, A. J. Griswold, J. Gilbert, E. Duketis, B. A.  
674 Dombroski, M. V. De Jonge, M. Cuccaro, E. L. Crawford, C. T. Correia, J. Conroy, I. C.  
675 Conceicao, A. G. Chiochetti, J. P. Casey, G. Cai, C. Cabrol, N. Bolshakova, E.  
676 Bacchelli, R. Anney, S. Gallinger, M. Cotterchio, G. Casey, L. Zwaigenbaum, K.  
677 Wittermeyer, K. Wing, S. Wallace, H. van Engeland, A. Tryfon, S. Thomson, L. Soorya,  
678 B. Roge, W. Roberts, F. Poustka, S. Moug, N. Minshew, L. A. McInnes, S. G. McGrew,  
679 C. Lord, M. Leboyer, A. S. Le Couteur, A. Kolevzon, P. Jimenez Gonzalez, S. Jacob, R.  
680 Holt, S. Guter, J. Green, A. Green, C. Gillberg, B. A. Fernandez, F. Duque, R. Delorme,  
681 G. Dawson, P. Chaste, C. Cafe, S. Brennan, T. Bourgeron, P. F. Bolton, S. Bolte, R.  
682 Bernier, G. Baird, A. J. Bailey, E. Anagnostou, J. Almeida, E. M. Wijsman, V. J.  
683 Vieland, A. M. Vicente, G. D. Schellenberg, M. Pericak-Vance, A. D. Paterson, J. R.  
684 Parr, G. Oliveira, J. I. Nurnberger, A. P. Monaco, E. Maestrini, S. M. Klauck, H.  
685 Hakonarson, J. L. Haines, D. H. Geschwind, C. M. Freitag, S. E. Folstein, S. Ennis, H.  
686 Coon, A. Battaglia, P. Szatmari, J. S. Sutcliffe, J. Hallmayer, M. Gill, E. H. Cook, J. D.  
687 Buxbaum, B. Devlin, L. Gallagher, C. Betancur, S. W. Scherer, Convergence of genes  
688 and cellular pathways dysregulated in autism spectrum disorders. *American journal of*  
689 *human genetics* **94**, 677 (May 1, 2014).
- 690 11. S. J. Sanders, X. He, A. J. Willsey, A. G. Ercan-Sencicek, K. E. Samocha, A. E. Cicek,  
691 M. T. Murtha, V. H. Bal, S. L. Bishop, S. Dong, A. P. Goldberg, C. Jinlu, J. F. Keaney,

- 692 3rd, L. Klei, J. D. Mandell, D. Moreno-De-Luca, C. S. Poultney, E. B. Robinson, L.  
693 Smith, T. Solli-Nowlan, M. Y. Su, N. A. Teran, M. F. Walker, D. M. Werling, A. L.  
694 Beaudet, R. M. Cantor, E. Fombonne, D. H. Geschwind, D. E. Grice, C. Lord, J. K.  
695 Lowe, S. M. Mane, D. M. Martin, E. M. Morrow, M. E. Talkowski, J. S. Sutcliffe, C. A.  
696 Walsh, T. W. Yu, D. H. Ledbetter, C. L. Martin, E. H. Cook, J. D. Buxbaum, M. J. Daly,  
697 B. Devlin, K. Roeder, M. W. State, Insights into Autism Spectrum Disorder Genomic  
698 Architecture and Biology from 71 Risk Loci. *Neuron* **87**, 1215 (Sep 23, 2015).
- 699 12. P. Chaste, L. Klei, S. J. Sanders, V. Hus, M. T. Murtha, J. K. Lowe, A. J. Willsey, D.  
700 Moreno-De-Luca, T. W. Yu, E. Fombonne, D. Geschwind, D. E. Grice, D. H. Ledbetter,  
701 S. M. Mane, D. M. Martin, E. M. Morrow, C. A. Walsh, J. S. Sutcliffe, C. Lese Martin,  
702 A. L. Beaudet, C. Lord, M. W. State, E. H. Cook, Jr., B. Devlin, A genome-wide  
703 association study of autism using the Simons Simplex Collection: Does reducing  
704 phenotypic heterogeneity in autism increase genetic homogeneity? *Biological psychiatry*  
705 **77**, 775 (May 1, 2015).
- 706 13. E. B. Robinson, K. E. Samocha, J. A. Kosmicki, L. McGrath, B. M. Neale, R. H. Perlis,  
707 M. J. Daly, Autism spectrum disorder severity reflects the average contribution of de  
708 novo and familial influences. *Proceedings of the National Academy of Sciences of the*  
709 *United States of America* **111**, 15161 (Oct 21, 2014).
- 710 14. K. E. Samocha, E. B. Robinson, S. J. Sanders, C. Stevens, A. Sabo, L. M. McGrath, J. A.  
711 Kosmicki, K. Rehnstrom, S. Mallick, A. Kirby, D. P. Wall, D. G. MacArthur, S. B.  
712 Gabriel, M. DePristo, S. M. Purcell, A. Palotie, E. Boerwinkle, J. D. Buxbaum, E. H.  
713 Cook, Jr., R. A. Gibbs, G. D. Schellenberg, J. S. Sutcliffe, B. Devlin, K. Roeder, B. M.  
714 Neale, M. J. Daly, A framework for the interpretation of de novo mutation in human  
715 disease. *Nature genetics* **46**, 944 (Sep, 2014).
- 716 15. M. Ronemus, I. Iossifov, D. Levy, M. Wigler, The role of de novo mutations in the  
717 genetics of autism spectrum disorders. *Nature reviews. Genetics* **15**, 133 (Feb, 2014).
- 718 16. S. J. Sanders, A. G. Ercan-Sencicek, V. Hus, R. Luo, M. T. Murtha, D. Moreno-De-Luca,  
719 S. H. Chu, M. P. Moreau, A. R. Gupta, S. A. Thomson, C. E. Mason, K. Bilguvar, P. B.  
720 Celestino-Soper, M. Choi, E. L. Crawford, L. Davis, N. R. Wright, R. M. Dhodapkar, M.  
721 DiCola, N. M. DiLullo, T. V. Fernandez, V. Fielding-Singh, D. O. Fishman, S. Frahm, R.  
722 Garagaloyan, G. S. Goh, S. Kammela, L. Klei, J. K. Lowe, S. C. Lund, A. D. McGrew,  
723 K. A. Meyer, W. J. Moffat, J. D. Murdoch, B. J. O'Roak, G. T. Ober, R. S. Pottenger, M.  
724 J. Raubeson, Y. Song, Q. Wang, B. L. Yaspan, T. W. Yu, I. R. Yurkiewicz, A. L.  
725 Beaudet, R. M. Cantor, M. Curland, D. E. Grice, M. Gunel, R. P. Lifton, S. M. Mane, D.  
726 M. Martin, C. A. Shaw, M. Sheldon, J. A. Tischfield, C. A. Walsh, E. M. Morrow, D. H.  
727 Ledbetter, E. Fombonne, C. Lord, C. L. Martin, A. I. Brooks, J. S. Sutcliffe, E. H. Cook,  
728 Jr., D. Geschwind, K. Roeder, B. Devlin, M. W. State, Multiple recurrent de novo CNVs,  
729 including duplications of the 7q11.23 Williams syndrome region, are strongly associated  
730 with autism. *Neuron* **70**, 863 (Jun 9, 2011).
- 731 17. D. J. Weiner, E. M. Wigdor, S. Ripke, R. K. Walters, J. A. Kosmicki, J. Grove, K. E.  
732 Samocha, J. I. Goldstein, A. Okbay, J. Bybjerg-Grauholm, T. Werge, D. M. Hougaard, J.  
733 Taylor, D. Skuse, B. Devlin, R. Anney, S. J. Sanders, S. Bishop, P. B. Mortensen, A. D.  
734 Borglum, G. D. Smith, M. J. Daly, E. B. Robinson, Polygenic transmission  
735 disequilibrium confirms that common and rare variation act additively to create risk for  
736 autism spectrum disorders. *Nature genetics* **49**, 978 (Jul, 2017).



- 737 18. X. Ji, R. L. Kember, C. D. Brown, M. Bucan, Increased burden of deleterious variants in  
738 essential genes in autism spectrum disorder. *Proceedings of the National Academy of*  
739 *Sciences of the United States of America* **113**, 15054 (Dec 27, 2016).
- 740 19. R. Ben-Shalom, C. M. Keeshen, K. N. Berrios, J. Y. An, S. J. Sanders, K. J. Bender,  
741 Opposing Effects on NaV1.2 Function Underlie Differences Between SCN2A Variants  
742 Observed in Individuals With Autism Spectrum Disorder or Infantile Seizures. *Biological*  
743 *psychiatry* **82**, 224 (Aug 1, 2017).
- 744 20. M. Kircher, D. M. Witten, P. Jain, B. J. O’Roak, G. M. Cooper, J. Shendure, A general  
745 framework for estimating the relative pathogenicity of human genetic variants. *Nature*  
746 *genetics* **46**, 310 (Mar, 2014).
- 747 21. S. Richards, N. Aziz, S. Bale, D. Bick, S. Das, J. Gastier-Foster, W. W. Grody, M.  
748 Hegde, E. Lyon, E. Spector, K. Voelkerding, H. L. Rehm, Standards and guidelines for  
749 the interpretation of sequence variants: a joint consensus recommendation of the  
750 American College of Medical Genetics and Genomics and the Association for Molecular  
751 Pathology. *Genetics in medicine : official journal of the American College of Medical*  
752 *Genetics* **17**, 405 (May, 2015).
- 753 22. D. Guala, E. L. L. Sonnhammer, A large-scale benchmark of gene prioritization methods.  
754 *Scientific reports* **7**, 46598 (Apr 21, 2017).
- 755 23. G. D. Fischbach, C. Lord, The Simons Simplex Collection: a resource for identification  
756 of autism genetic risk factors. *Neuron* **68**, 192 (Oct 21, 2010).
- 757 24. S. L. Van Driest, Y. Shi, E. A. Bowton, J. S. Schildcrout, J. F. Peterson, J. Pulley, J. C.  
758 Denny, D. M. Roden, Clinically actionable genotypes among 10,000 patients with  
759 preemptive pharmacogenomic testing. *Clinical pharmacology and therapeutics* **95**, 423  
760 (Apr, 2014).
- 761 25. S. N. Basu, R. Kollu, S. Banerjee-Basu, AutDB: a gene reference resource for autism  
762 research. *Nucleic acids research* **37**, D832 (Jan, 2009).
- 763 26. X. Jiao, B. T. Sherman, W. Huang da, R. Stephens, M. W. Baseler, H. C. Lane, R. A.  
764 Lempicki, DAVID-WS: a stateful web service to facilitate gene/protein list analysis.  
765 *Bioinformatics* **28**, 1805 (Jul 1, 2012).
- 766 27. A. R. Alexa, J. (2016).
- 767 28. N. Krumm, T. N. Turner, C. Baker, L. Vives, K. Mohajeri, K. Witherspoon, A. Raja, B.  
768 P. Coe, H. A. Stessman, Z. X. He, S. M. Leal, R. Bernier, E. E. Eichler, Excess of rare,  
769 inherited truncating mutations in autism. *Nature genetics* **47**, 582 (Jun, 2015).
- 770 29. W. McLaren, L. Gil, S. E. Hunt, H. S. Riat, G. R. Ritchie, A. Thormann, P. Flicek, F.  
771 Cunningham, The Ensembl Variant Effect Predictor. *Genome biology* **17**, 122 (Jun 6,  
772 2016).
- 773 30. A. McKenna, M. Hanna, E. Banks, A. Sivachenko, K. Cibulskis, A. Kernysky, K.  
774 Garimella, D. Altshuler, S. Gabriel, M. Daly, M. A. DePristo, The Genome Analysis  
775 Toolkit: a MapReduce framework for analyzing next-generation DNA sequencing data.  
776 *Genome research* **20**, 1297 (Sep, 2010).
- 777 31. E. M. Garrison, G, Haplotype-based variant detection from short-read sequencing.  
778 *arXiv:1207.3907v2*, (2012).
- 779 32. A. R. Carson, E. N. Smith, H. Matsui, S. K. Braekkan, K. Jepsen, J. B. Hansen, K. A.  
780 Frazer, Effective filtering strategies to improve data quality from population-based whole  
781 exome sequencing studies. *BMC bioinformatics* **15**, 125 (May 2, 2014).

- 782 33. L. C. Walters-Sen, S. Hashimoto, D. L. Thrush, S. Reshmi, J. M. Gastier-Foster, C.  
783 Astbury, R. E. Pyatt, Variability in pathogenicity prediction programs: impact on clinical  
784 diagnostics. *Molecular genetics & genomic medicine* **3**, 99 (Mar, 2015).
- 785 34. H. Yang, K. Wang, Genomic variant annotation and prioritization with ANNOVAR and  
786 wANNOVAR. *Nature protocols* **10**, 1556 (Oct, 2015).
- 787 35. P. C. Ng, S. Henikoff, Predicting deleterious amino acid substitutions. *Genome research*  
788 **11**, 863 (May, 2001).
- 789 36. I. Adzhubei, D. M. Jordan, S. R. Sunyaev, Predicting functional effect of human  
790 missense mutations using PolyPhen-2. *Current protocols in human genetics* **Chapter 7**,  
791 Unit7 20 (Jan, 2013).
- 792 37. J. M. Schwarz, C. Rodelsperger, M. Schuelke, D. Seelow, MutationTaster evaluates  
793 disease-causing potential of sequence alterations. *Nature methods* **7**, 575 (Aug, 2010).
- 794 38. B. Reva, Y. Antipin, C. Sander, Predicting the functional impact of protein mutations:  
795 application to cancer genomics. *Nucleic acids research* **39**, e118 (Sep 1, 2011).
- 796 39. S. Chun, J. C. Fay, Identification of deleterious mutations within three human genomes.  
797 *Genome research* **19**, 1553 (Sep, 2009).
- 798 40. H. A. Shihab, M. F. Rogers, J. Gough, M. Mort, D. N. Cooper, I. N. Day, T. R. Gaunt, C.  
799 Campbell, An integrative approach to predicting the functional effects of non-coding and  
800 coding sequence variation. *Bioinformatics* **31**, 1536 (May 15, 2015).
- 801 41. C. Dong, P. Wei, X. Jian, R. Gibbs, E. Boerwinkle, K. Wang, X. Liu, Comparison and  
802 integration of deleteriousness prediction methods for nonsynonymous SNVs in whole  
803 exome sequencing studies. *Human molecular genetics* **24**, 2125 (Apr 15, 2015).
- 804 42. K. A. Jagadeesh, A. M. Wenger, M. J. Berger, H. Guturu, P. D. Stenson, D. N. Cooper, J.  
805 A. Bernstein, G. Bejerano, M-CAP eliminates a majority of variants of uncertain  
806 significance in clinical exomes at high sensitivity. *Nature genetics* **48**, 1581 (Dec, 2016).
- 807 43. A. R. Quinlan, BEDTools: The Swiss-Army Tool for Genome Feature Analysis. *Current*  
808 *protocols in bioinformatics* **47**, 11 12 1 (Sep 8, 2014).
- 809 44. O. J. Veatch, J. Veenstra-Vanderweele, M. Potter, M. A. Pericak-Vance, J. L. Haines,  
810 Genetically meaningful phenotypic subgroups in autism spectrum disorders. *Genes*,  
811 *brain, and behavior* **13**, 276 (Mar, 2014).
- 812 45. E. L. Laliberté, P.; Shipley, B. (CRAN, 2014).
- 813 46. M. M. Mukaka, Statistics corner: A guide to appropriate use of correlation coefficient in  
814 medical research. *Malawi medical journal : the journal of Medical Association of Malawi*  
815 **24**, 69 (Sep, 2012).
- 816 47. G. P. Brock, V.; Datta, S.; Datta, S. (Journal of Statistical Software, 2008).
- 817 48. M. R. Maechler, P.; Struyf A.; Hubert, M.; Hornik, K.; Studer, M.; Roudier, P. ;  
818 Gonzalez, J.; Kozłowski, K. (CRAN, 2018).
- 819 49. D. Steinley, Properties of the Hubert-Arabie adjusted Rand index. *Psychological methods*  
820 **9**, 386 (Sep, 2004).
- 821 50. A. F. Roche, D. Mukherjee, S. M. Guo, W. M. Moore, Head circumference reference  
822 data: birth to 18 years. *Pediatrics* **79**, 706 (May, 1987).
- 823 51. O. J. Veatch, J. S. Sutcliffe, Z. E. Warren, B. T. Keenan, M. H. Potter, B. A. Malow,  
824 Shorter sleep duration is associated with social impairment and comorbidities in ASD.  
825 *Autism research : official journal of the International Society for Autism Research*, (Mar  
826 16, 2017).



- 827 52. Y. H. Benjamini, Y., Controlling the false discovery rate: a practical and powerful  
828 approach to multiple testing. *Journal of the Royal Statistical Society. Series B*  
829 (*Methodological*) **57**, 289 (1995).
- 830 53. S. Lê, J. Josse, F. Husson, FactoMineR: An R Package for Multivariate Analysis. *2008*  
831 **25**, 18 (2008-03-18, 2008).
- 832 54. Expansion of the Gene Ontology knowledgebase and resources. *Nucleic acids research*  
833 **45**, D331 (Jan 4, 2017).
- 834 55. M. Ashburner, C. A. Ball, J. A. Blake, D. Botstein, H. Butler, J. M. Cherry, A. P. Davis,  
835 K. Dolinski, S. S. Dwight, J. T. Eppig, M. A. Harris, D. P. Hill, L. Issel-Tarver, A.  
836 Kasarskis, S. Lewis, J. C. Matese, J. E. Richardson, M. Ringwald, G. M. Rubin, G.  
837 Sherlock, Gene ontology: tool for the unification of biology. The Gene Ontology  
838 Consortium. *Nature genetics* **25**, 25 (May, 2000).
- 839 56. H. J. Yoo, I. H. Cho, M. Park, E. Cho, S. C. Cho, B. N. Kim, J. W. Kim, S. A. Kim,  
840 Association between PTGS2 polymorphism and autism spectrum disorders in Korean  
841 trios. *Neuroscience research* **62**, 66 (Sep, 2008).
- 842 57. I. Cataldo, A. Azhari, G. Esposito, A Review of Oxytocin and Arginine-Vasopressin  
843 Receptors and Their Modulation of Autism Spectrum Disorder. *Frontiers in molecular*  
844 *neuroscience* **11**, 27 (2018).
- 845 58. C. L. Muller, A. M. J. Anacker, J. Veenstra-VanderWeele, The serotonin system in  
846 autism spectrum disorder: From biomarker to animal models. *Neuroscience* **321**, 24 (May  
847 3, 2016).
- 848 59. A. K. Singh, J. Zajdel, E. Mirrasekhian, N. Almoosawi, I. Frisch, A. M. Klawonn, M.  
849 Jaarola, M. Fritz, D. Engblom, Prostaglandin-mediated inhibition of serotonin signaling  
850 controls the affective component of inflammatory pain. *The Journal of clinical*  
851 *investigation* **127**, 1370 (Apr 3, 2017).
- 852 60. Y. Sugimoto, A. Yamasaki, E. Segi, K. Tsuboi, Y. Aze, T. Nishimura, H. Oida, N.  
853 Yoshida, T. Tanaka, M. Katsuyama, K. Hasumoto, T. Murata, M. Hirata, F. Ushikubi, M.  
854 Negishi, A. Ichikawa, S. Narumiya, Failure of parturition in mice lacking the  
855 prostaglandin F receptor. *Science* **277**, 681 (Aug 1, 1997).
- 856 61. C. F. Thorn, T. Grosser, T. E. Klein, R. B. Altman, PharmGKB summary: very important  
857 pharmacogene information for PTGS2. *Pharmacogenetics and genomics* **21**, 607 (Sep,  
858 2011).
- 859 62. M. Whirl-Carrillo, E. M. McDonagh, J. M. Hebert, L. Gong, K. Sangkuhl, C. F. Thorn,  
860 R. B. Altman, T. E. Klein, Pharmacogenomics knowledge for personalized medicine.  
861 *Clinical pharmacology and therapeutics* **92**, 414 (Oct, 2012).
- 862 63. X. P. Miao, J. S. Li, Q. Ouyang, R. W. Hu, Y. Zhang, H. Y. Li, Tolerability of selective  
863 cyclooxygenase 2 inhibitors used for the treatment of rheumatological manifestations of  
864 inflammatory bowel disease. *The Cochrane database of systematic reviews*, CD007744  
865 (Oct 23, 2014).
- 866 64. M. Lek, K. J. Karczewski, E. V. Minikel, K. E. Samocha, E. Banks, T. Fennell, A. H.  
867 O'Donnell-Luria, J. S. Ware, A. J. Hill, B. B. Cummings, T. Tukiainen, D. P. Birnbaum,  
868 J. A. Kosmicki, L. E. Duncan, K. Estrada, F. Zhao, J. Zou, E. Pierce-Hoffman, J.  
869 Berghout, D. N. Cooper, N. DeFlaux, M. DePristo, R. Do, J. Flannick, M. Fromer, L.  
870 Gauthier, J. Goldstein, N. Gupta, D. Howrigan, A. Kiezun, M. I. Kurki, A. L. Moonshine,  
871 P. Natarajan, L. Orozco, G. M. Peloso, R. Poplin, M. A. Rivas, V. Ruano-Rubio, S. A.  
872 Rose, D. M. Ruderfer, K. Shakir, P. D. Stenson, C. Stevens, B. P. Thomas, G. Tiao, M. T.

- 873 Tusie-Luna, B. Weisburd, H. H. Won, D. Yu, D. M. Altshuler, D. Ardissino, M.  
874 Boehnke, J. Danesh, S. Donnelly, R. Elosua, J. C. Florez, S. B. Gabriel, G. Getz, S. J.  
875 Glatt, C. M. Hultman, S. Kathiresan, M. Laakso, S. McCarroll, M. I. McCarthy, D.  
876 McGovern, R. McPherson, B. M. Neale, A. Palotie, S. M. Purcell, D. Saleheen, J. M.  
877 Scharf, P. Sklar, P. F. Sullivan, J. Tuomilehto, M. T. Tsuang, H. C. Watkins, J. G.  
878 Wilson, M. J. Daly, D. G. MacArthur, Analysis of protein-coding genetic variation in  
879 60,706 humans. *Nature* **536**, 285 (Aug 18, 2016).
- 880 65. M. Bidinosti, P. Botta, S. Kruttner, C. C. Proenca, N. Stoehr, M. Bernhard, I. Fruh, M.  
881 Mueller, D. Bonenfant, H. Voshol, W. Carbone, S. J. Neal, S. M. McTighe, G. Roma, R.  
882 E. Dolmetsch, J. A. Porter, P. Caroni, T. Bouwmeester, A. Luthi, I. Galimberti, CLK2  
883 inhibition ameliorates autistic features associated with SHANK3 deficiency. *Science* **351**,  
884 1199 (Mar 11, 2016).
- 885 66. A. F. Palazzo, E. S. Lee, Non-coding RNA: what is functional and what is junk?  
886 *Frontiers in genetics* **6**, 2 (2015).
- 887 67. V. Pejaver, S. D. Mooney, P. Radivojac, Missense variant pathogenicity predictors  
888 generalize well across a range of function-specific prediction challenges. *Human*  
889 *mutation* **38**, 1092 (Sep, 2017).
- 890 68. M. A. Care, C. J. Needham, A. J. Bulpitt, D. R. Westhead, Deleterious SNP prediction:  
891 be mindful of your training data! *Bioinformatics* **23**, 664 (Mar 15, 2007).
- 892 69. C. Knecht, M. Mort, O. Junge, D. N. Cooper, M. Krawczak, A. Caliebe, IMHOTEP-a  
893 composite score integrating popular tools for predicting the functional consequences of  
894 non-synonymous sequence variants. *Nucleic acids research* **45**, e13 (Feb 17, 2017).
- 895 70. G. Glusman, P. W. Rose, A. Prlic, J. Dougherty, J. M. Duarte, A. S. Hoffman, G. J.  
896 Barton, E. Bendixen, T. Bergquist, C. Bock, E. Brunk, M. Buljan, S. K. Burley, B. Cai,  
897 H. Carter, J. Gao, A. Godzik, M. Heuer, M. Hicks, T. Hrabe, R. Karchin, J. K. Leman, L.  
898 Lane, D. L. Masica, S. D. Mooney, J. Moul, G. S. Omenn, F. Pearl, V. Pejaver, S. M.  
899 Reynolds, A. Rokem, T. Schwede, S. Song, H. Tilgner, Y. Valasatava, Y. Zhang, E. W.  
900 Deutsch, Mapping genetic variations to three-dimensional protein structures to enhance  
901 variant interpretation: a proposed framework. *Genome medicine* **9**, 113 (Dec 18, 2017).
- 902 71. J. N. Constantino, S. A. Davis, R. D. Todd, M. K. Schindler, M. M. Gross, S. L. Brophy,  
903 L. M. Metzger, C. S. Shoushtari, R. Splinter, W. Reich, Validation of a brief quantitative  
904 measure of autistic traits: comparison of the social responsiveness scale with the autism  
905 diagnostic interview-revised. *Journal of autism and developmental disorders* **33**, 427  
906 (Aug, 2003).
- 907 72. J. K. Lowe, D. M. Werling, J. N. Constantino, R. M. Cantor, D. H. Geschwind, Social  
908 responsiveness, an autism endophenotype: genomewide significant linkage to two regions  
909 on chromosome 8. *The American journal of psychiatry* **172**, 266 (Mar 1, 2015).
- 910 73. H. Coon, M. E. Villalobos, R. J. Robison, N. J. Camp, D. S. Cannon, K. Allen-Brady, J.  
911 S. Miller, W. M. McMahon, Genome-wide linkage using the Social Responsiveness  
912 Scale in Utah autism pedigrees. *Molecular autism* **1**, 8 (Apr 8, 2010).
- 913 74. J. A. Duvall, A. Lu, R. M. Cantor, R. D. Todd, J. N. Constantino, D. H. Geschwind, A  
914 quantitative trait locus analysis of social responsiveness in multiplex autism families. *The*  
915 *American journal of psychiatry* **164**, 656 (Apr, 2007).
- 916 75. Y. V. Virkud, R. D. Todd, A. M. Abbacchi, Y. Zhang, J. N. Constantino, Familial  
917 aggregation of quantitative autistic traits in multiplex versus simplex autism. *American*

- 918 *journal of medical genetics. Part B, Neuropsychiatric genetics : the official publication of*  
919 *the International Society of Psychiatric Genetics* **150B**, 328 (Apr 5, 2009).
- 920 76. S. Bolte, F. Poustka, J. N. Constantino, Assessing autistic traits: cross-cultural validation  
921 of the social responsiveness scale (SRS). *Autism research : official journal of the*  
922 *International Society for Autism Research* **1**, 354 (Dec, 2008).
- 923 77. G. Azad, E. Reisinger, M. Xie, D. S. Mandell, Parent and Teacher Concordance on the  
924 Social Responsiveness Scale for Children with Autism. *School mental health* **8**, 368 (Sep,  
925 2016).
- 926 78. D. S. Murray, L. A. Ruble, H. Willis, C. A. Molloy, Parent and teacher report of social  
927 skills in children with autism spectrum disorders. *Language, speech, and hearing services*  
928 *in schools* **40**, 109 (Apr, 2009).
- 929 79. D. O. Black, G. L. Wallace, J. L. Sokoloff, L. Kenworthy, Brief report: IQ split predicts  
930 social symptoms and communication abilities in high-functioning children with autism  
931 spectrum disorders. *Journal of autism and developmental disorders* **39**, 1613 (Nov,  
932 2009).
- 933 80. J. N. Constantino, R. D. Todd, Autistic traits in the general population: a twin study.  
934 *Archives of general psychiatry* **60**, 524 (May, 2003).
- 935 81. N. Skunca, A. Altenhoff, C. Dessimoz, Quality of computationally inferred gene  
936 ontology annotations. *PLoS computational biology* **8**, e1002533 (May, 2012).
- 937

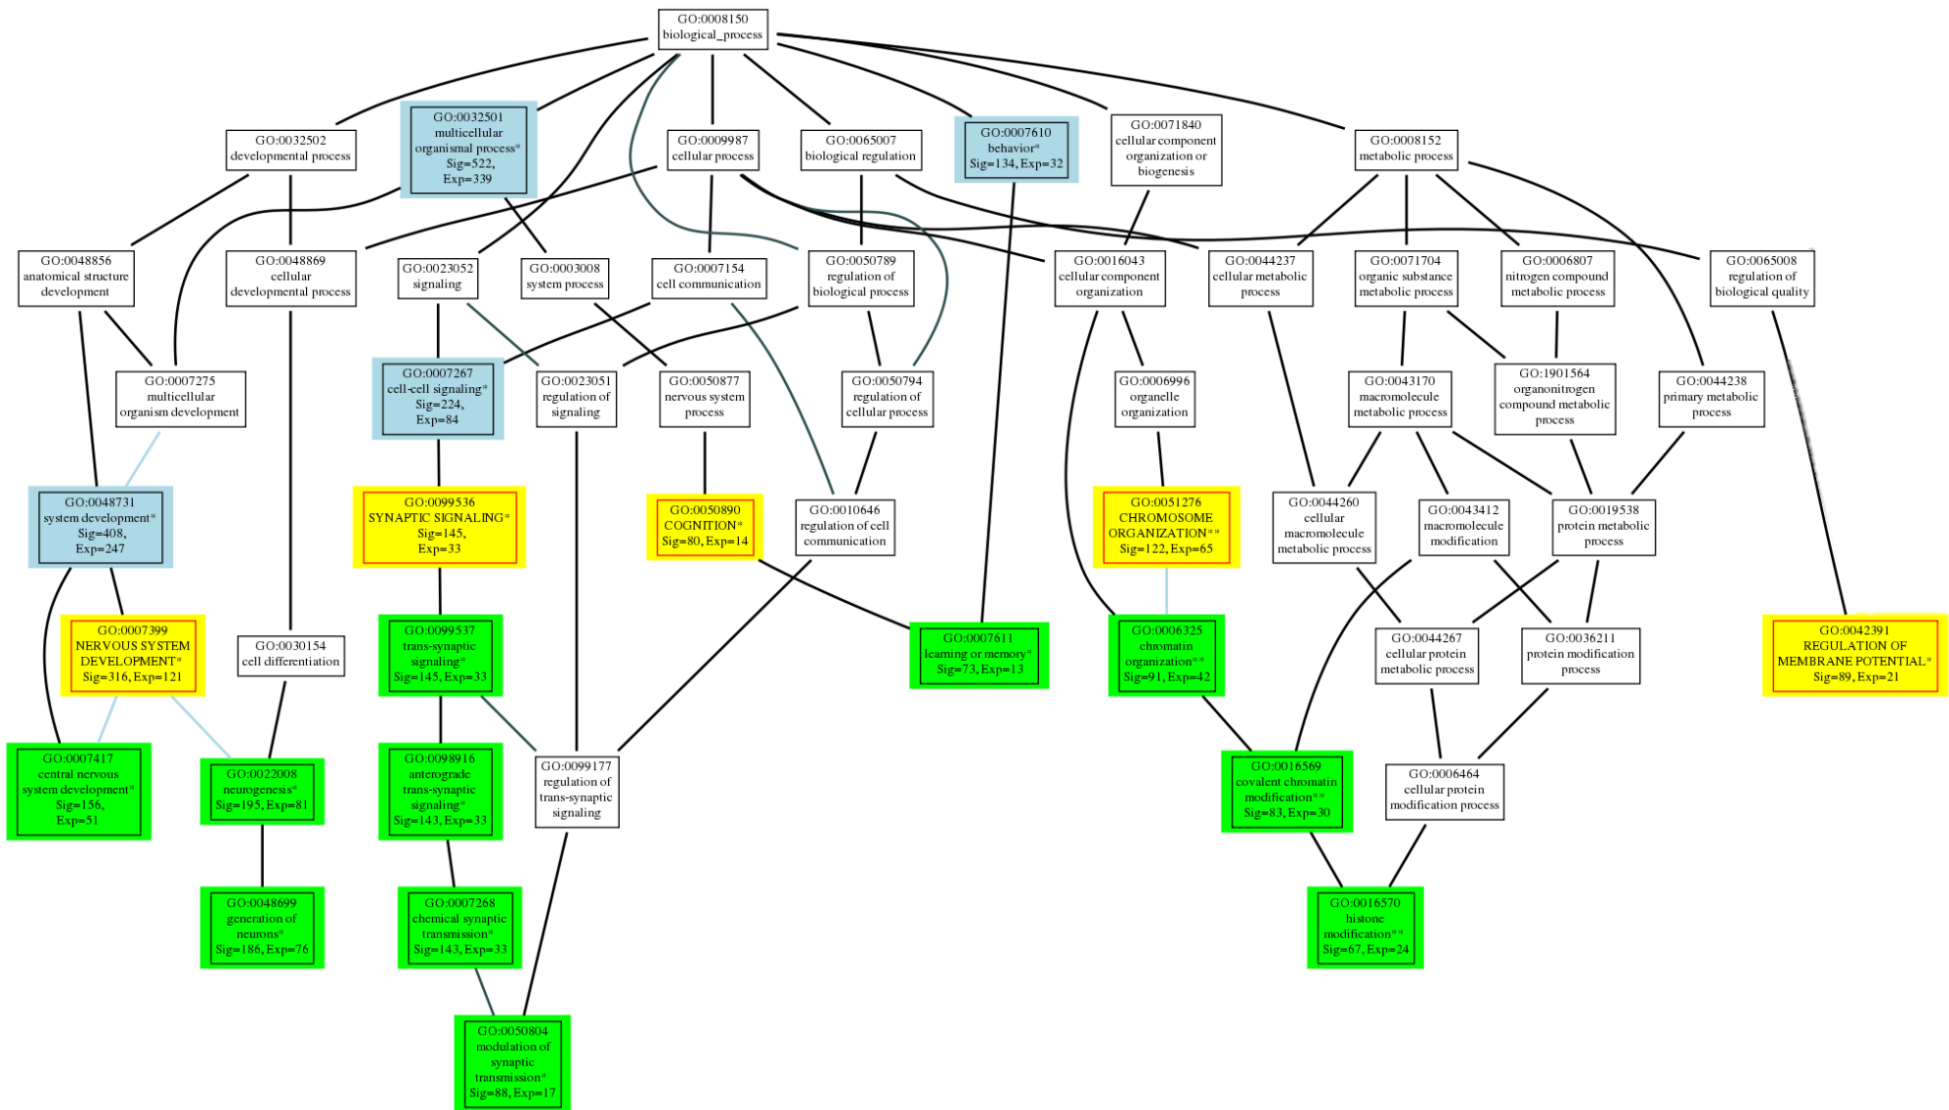

**Figure 1. Selection of unique biological processes with overrepresentation of ASD candidate genes for further study.** Shown is the distribution of significant terms in the GO structure for biological processes (GO:0008150). Terms highlighted in yellow indicate unique terms selected due to their place in the hierarchy and meaningfulness to ASD etiology. Terms highlighted in blue indicate significant processes considered too broad to be meaningful and green indicates significant child terms with complete genetic overlap to unique terms. Sig=the number of ASD candidate genes assigned to the process, Exp=the expected number of genes assigned by chance. \*denotes terms that were significant at Fisher's exact  $FDR < 1.0 \times 10^{-30}$  following the primary analysis of all 989 ASD risk genes, \*\* denotes terms that were significant at Fisher's exact  $FDR$  ranging from  $3.5 \times 10^{-17}$  to  $7.1 \times 10^{-12}$  following the secondary analysis run on genes unassigned to the top processes. Black lines connect terms that regulate each other, blue lines connect terms that are part of each other.

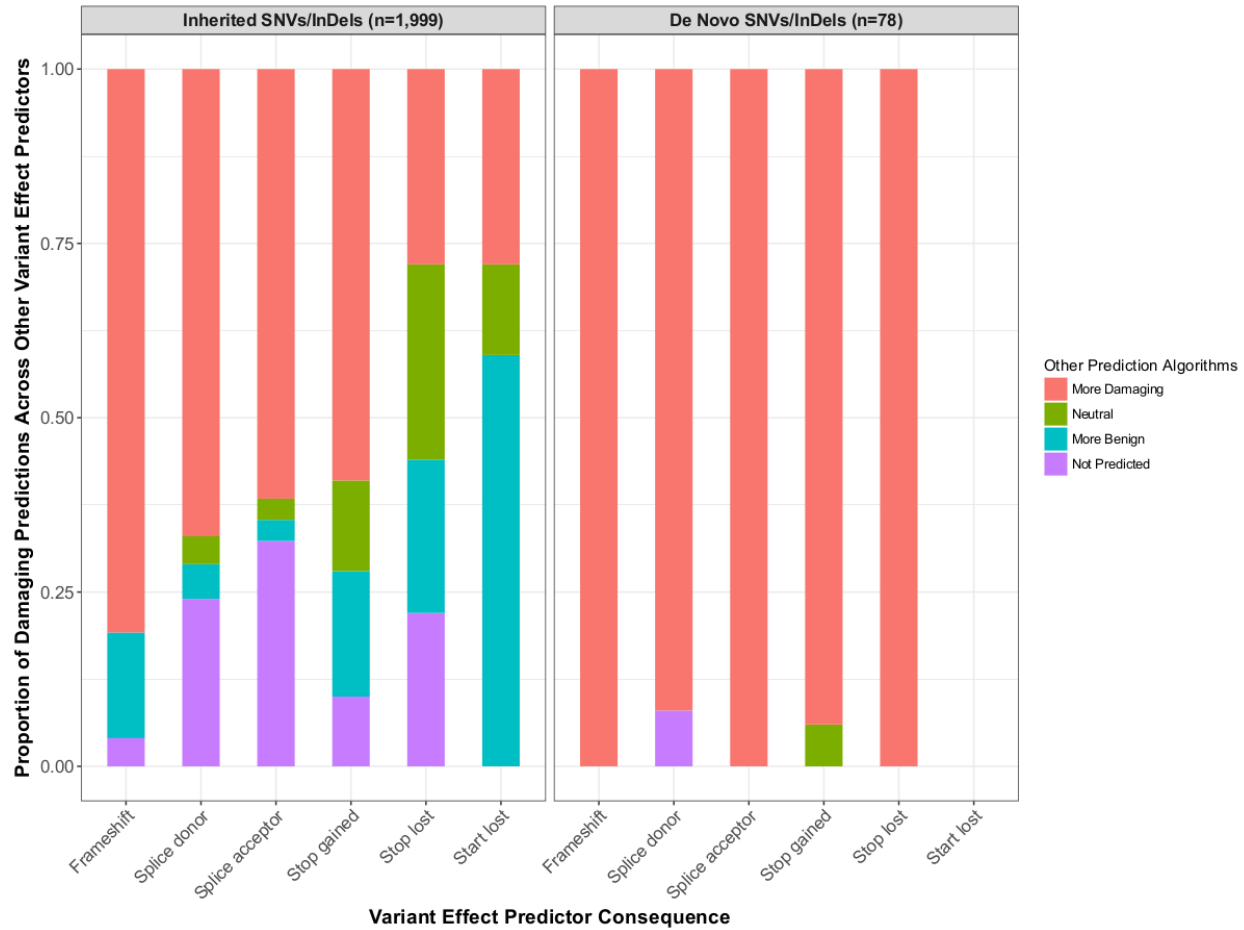

**Figure 2. Proportion of VEP consequences predicted to be damaging based on nine prediction algorithms.** Inherited variation resulting in frameshifts, splice-site and stop gains were more often predicted damaging compared to benign, while variants predicted to cause the loss of either stop or start sites were equally or more often predicted to be benign. *De novo* variants, regardless of the consequence were more often damaging.

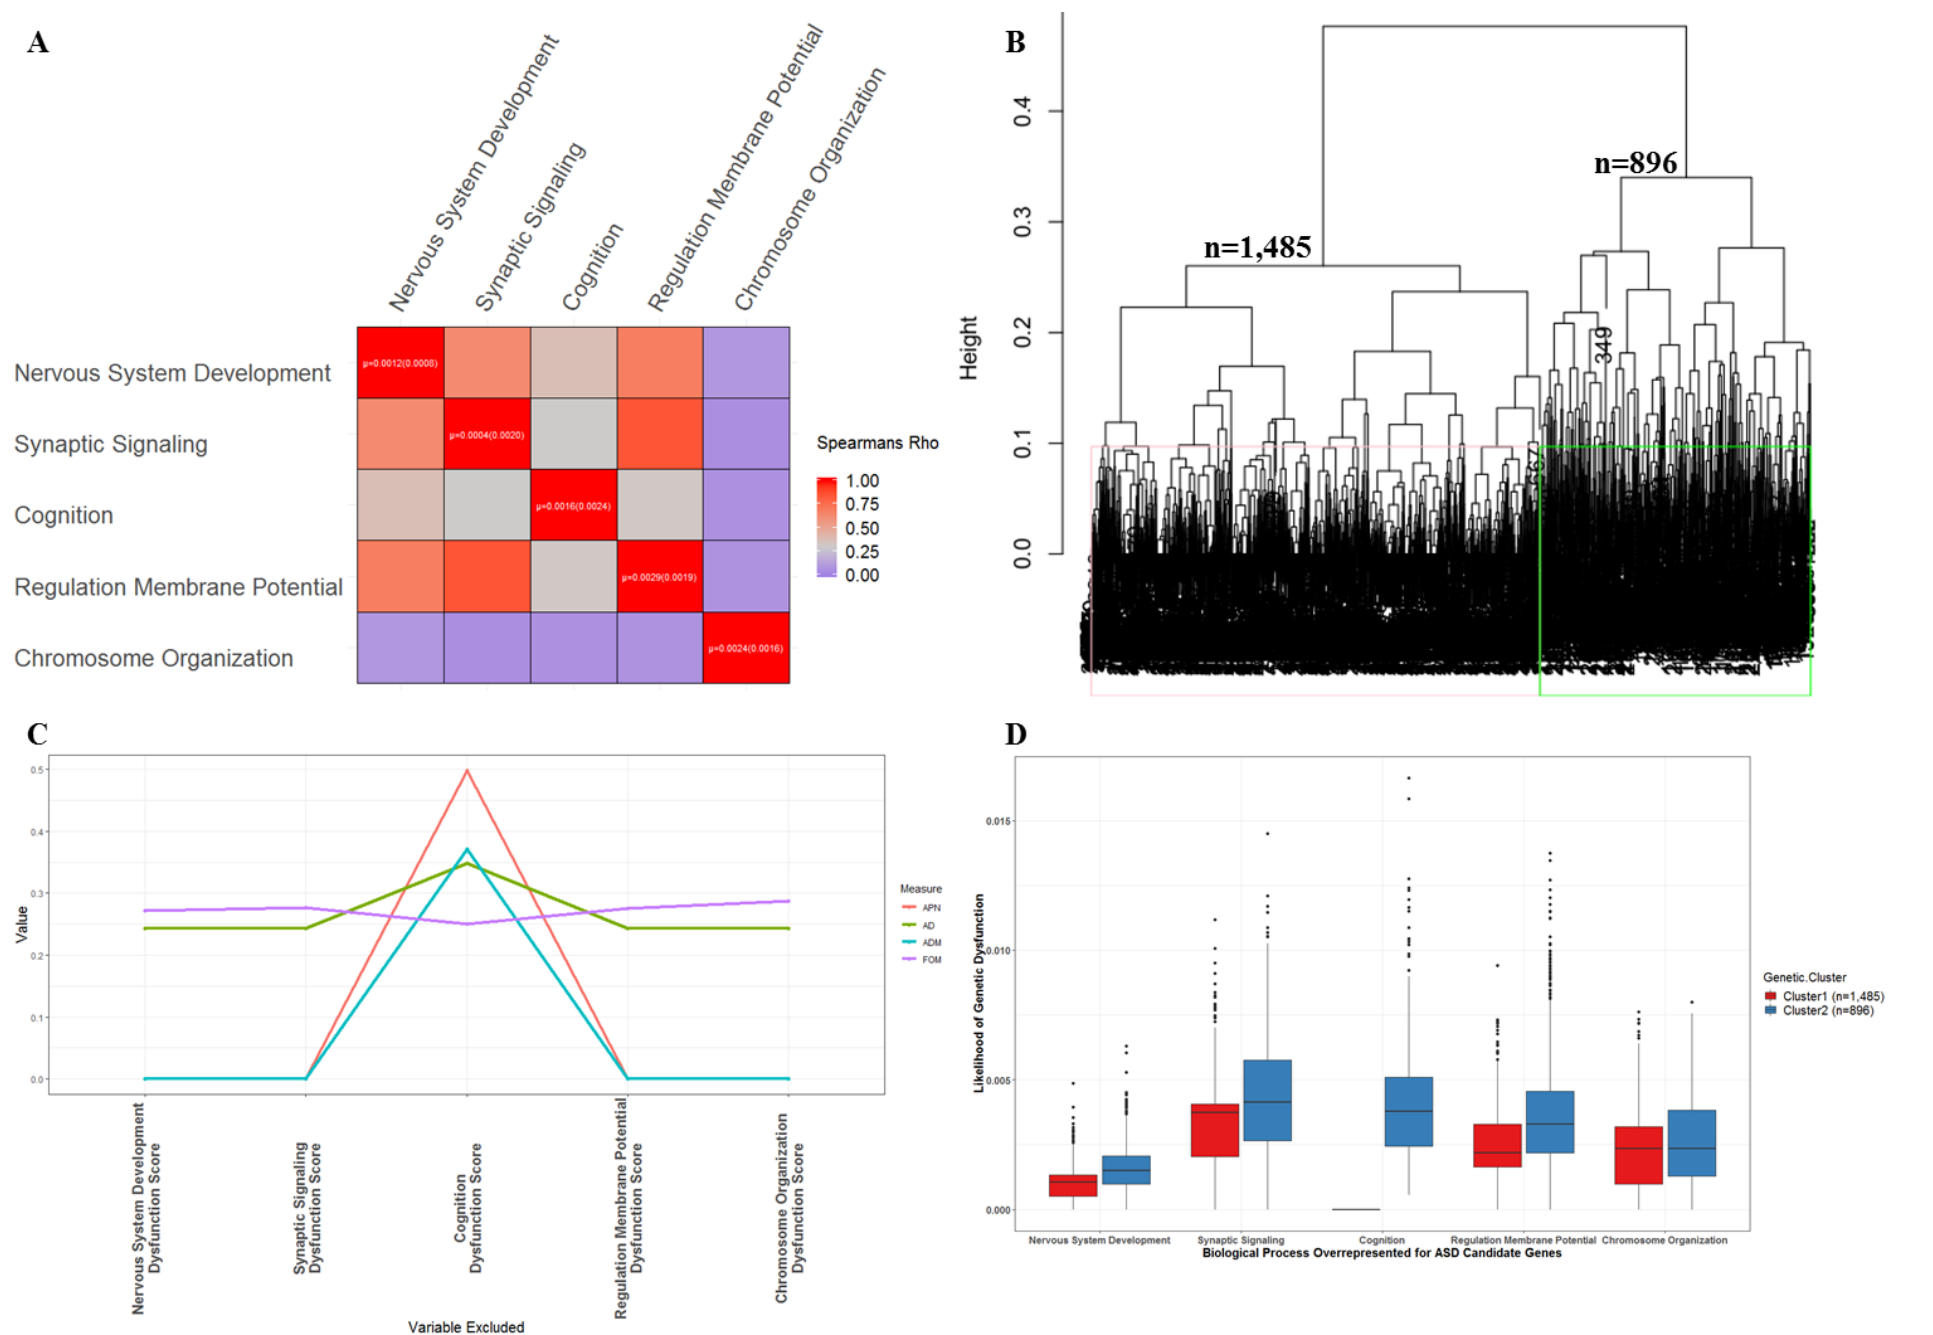

**Figure 3. Clustering individuals based on overall biological process dysfunction.** **A)** Correlation across scores reflecting dysfunction in biological processes with overrepresentation of ASD candidate genes indicates many individuals have dysfunction in >1 process. **B)** Clustering identified two distinct subgroups of individuals with more similar scores for overall biological process dysfunction (agglomerative coefficient=0.96). **C)** Sensitivity analyses indicate removing the scores had the strongest effect on stability of the clustering solution. APN=average proportion of non-overlap, AD=average distance, ADM=average distance between means, FOM=figure of merit. **D)** Evidence of dysfunction in genes involved in cognition primarily defined separation of individuals into either cluster 1 (no cognition gene dysfunction) or cluster 2 (cognition gene dysfunction).



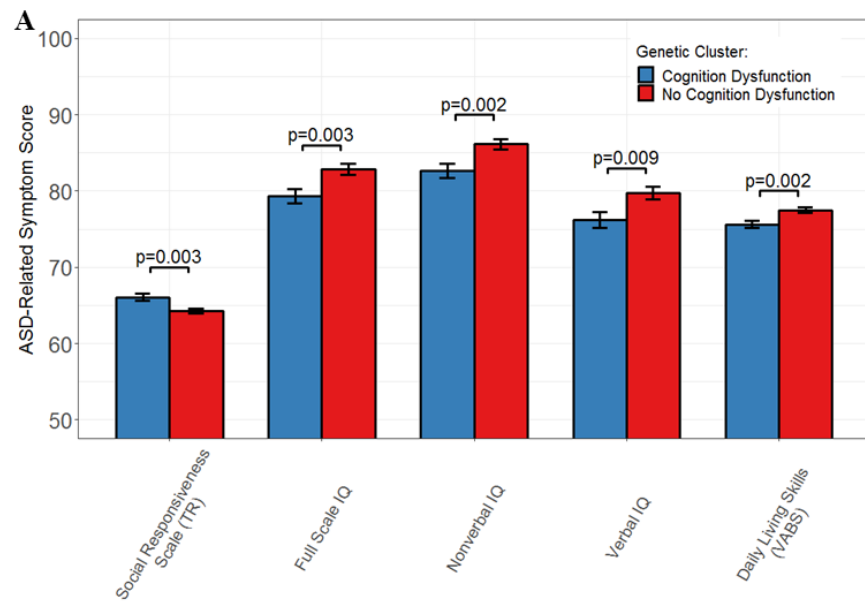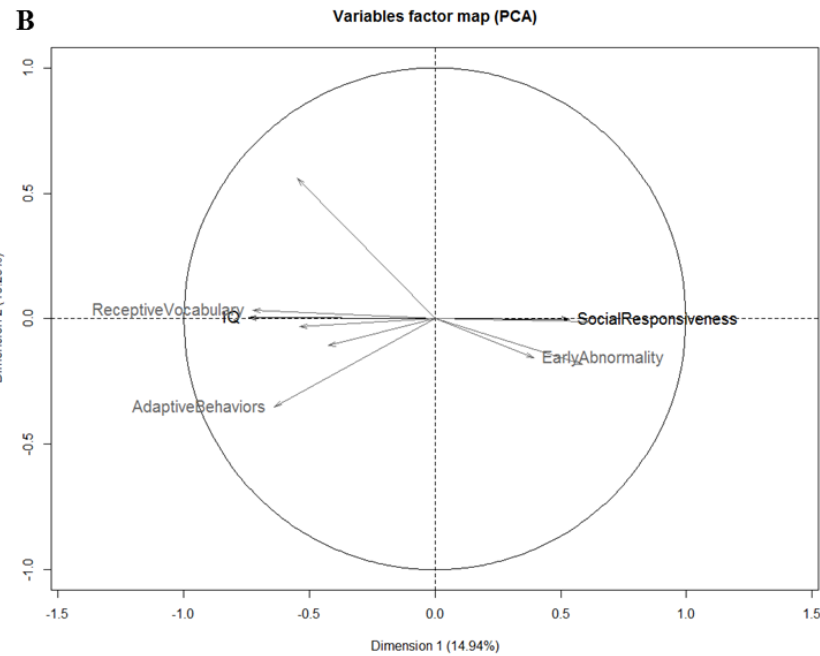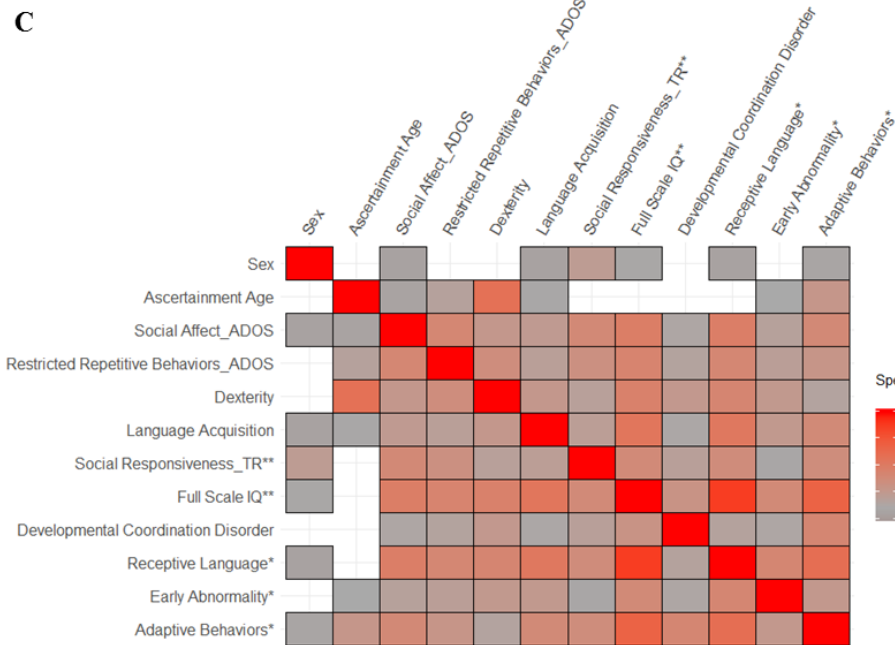

**Figure 4. Relationship between genetic and phenotypic differences.** **A)** T-tests comparing differences in the 27 quantitative ASD-related symptom measures between genetic clusters identified that social impairment was more severe and IQs and daily living skills were reduced in the cognition gene dysfunction cluster. **B)** Principal components analysis, while adjusting for correlations, of all 27 symptom measures identified that symptoms that were different between the genetic clusters majorly contributed to overall phenotype variability (as defined by Dimension 1). Black indicates symptom differences that remained significant ( $FDR \leq 0.04$ ) following multiple testing correction, gray indicates symptom differences based on an unadjusted significance threshold ( $p \leq 0.03$ ), and unlabeled arrows indicate symptoms that were not different but had strong contributions to phenotype variability. **C)** Significant ( $p < 0.05$ ) correlations are shown indicating that absolute values for many symptoms that were different between genetic clusters were correlated with those contributing majorly to overall phenotype variability.
